# Supplementary material for: Defective DNA damage repair leads to frequent catastrophic genomic events in murine and human tumors
Source: PubMed Central journal article supplement (PMC6232171; doi:10.1038/s41467-018-06925-4), 2018-11-12
Supplement: 41467_2018_6925_MOESM1_ESM.pdf [file 41467_2018_6925_MOESM1_ESM.pdf]

## **Supplementary Information**

**Defective DNA damage repair leads to frequent catastrophic genomic events in murine and human tumors**

Ratnaparkhe, Wong *et. al.*

**a.**

Log2 Ratio

**MB 1187**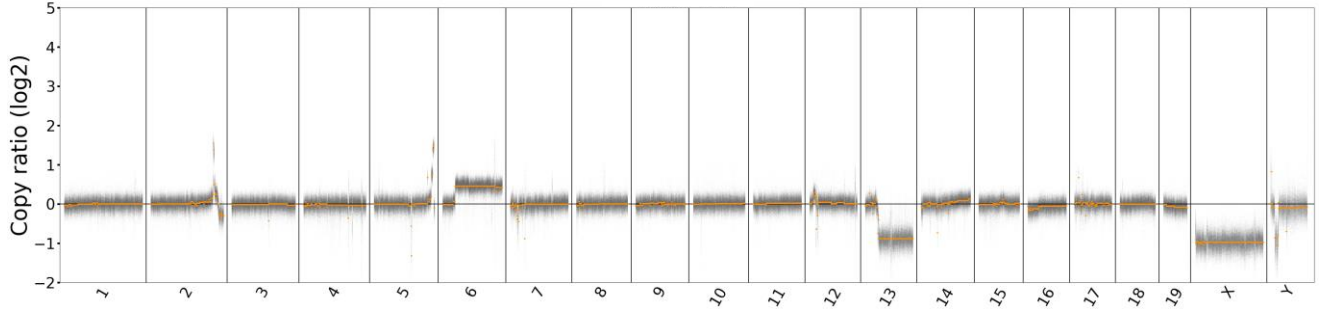**MB 1197**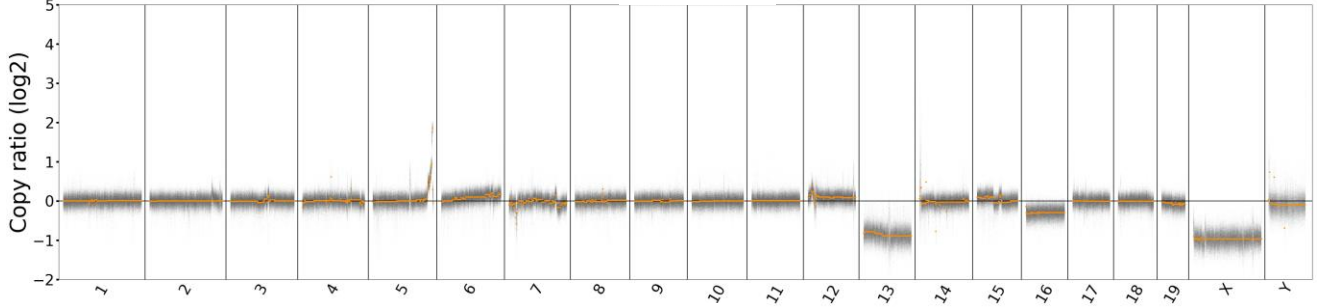**MB 1206**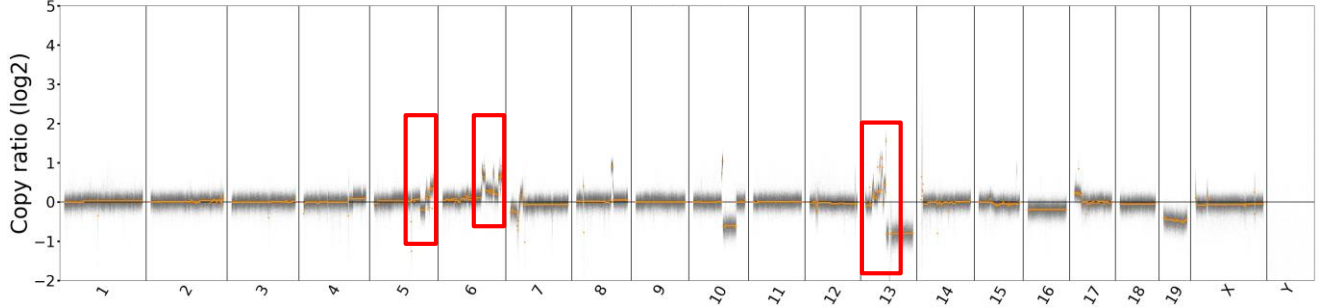**MB 1207**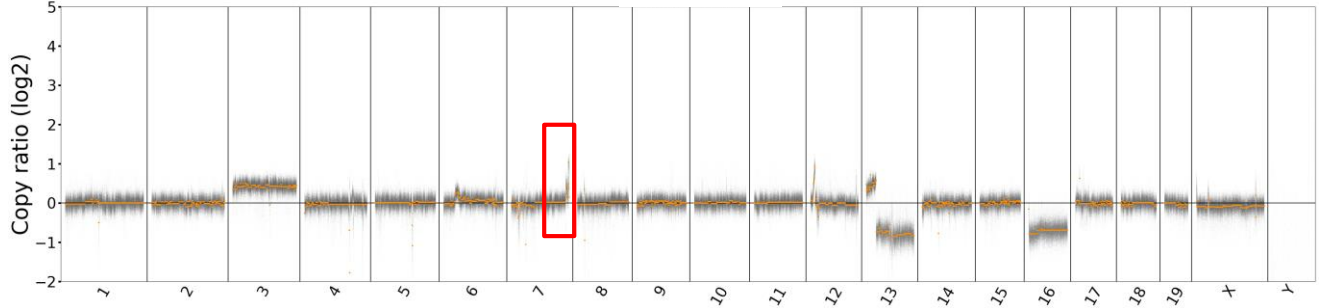**MB 1224**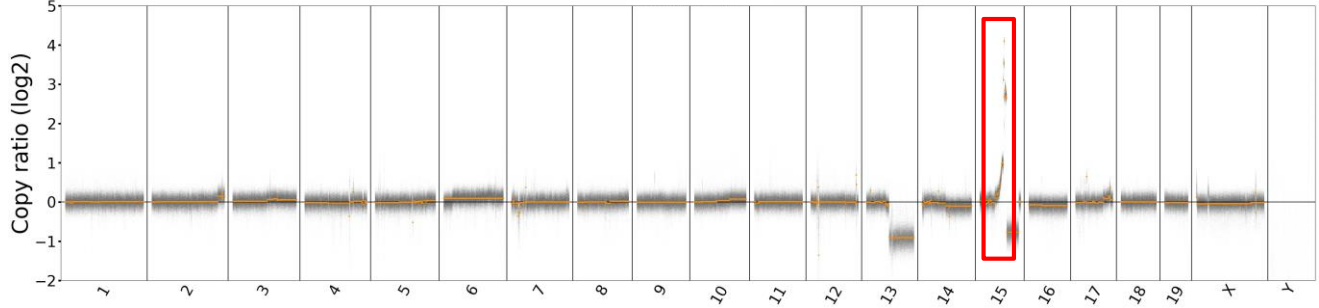

Chromosome

MB NXP005

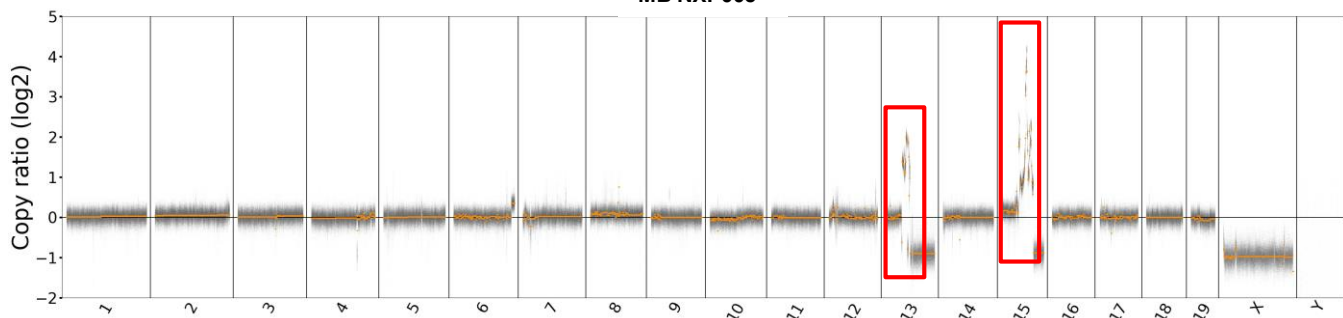

MB 706

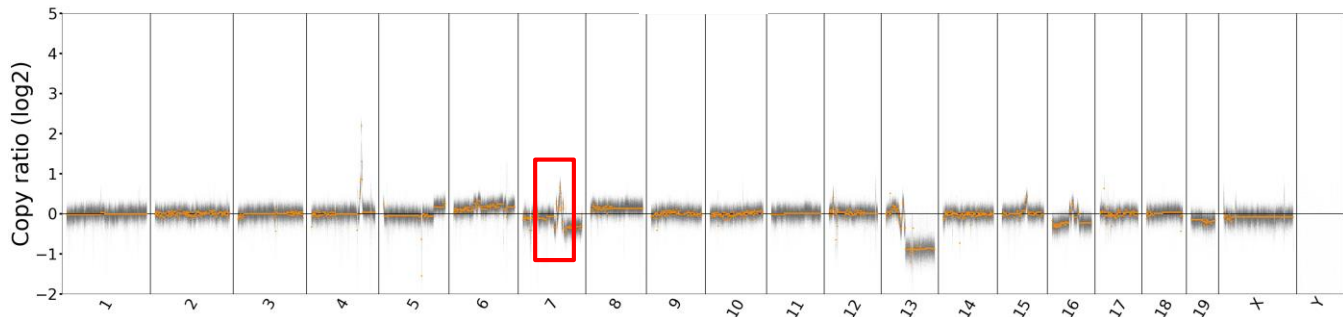

MB 506

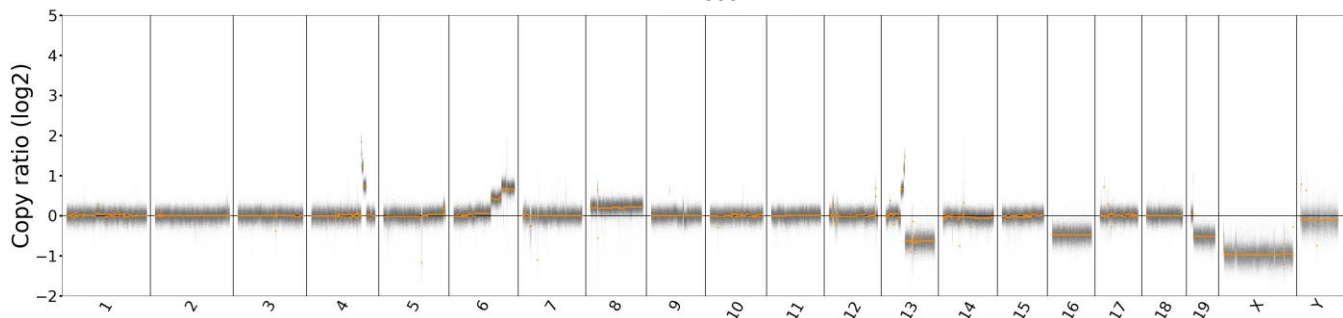

MB 594

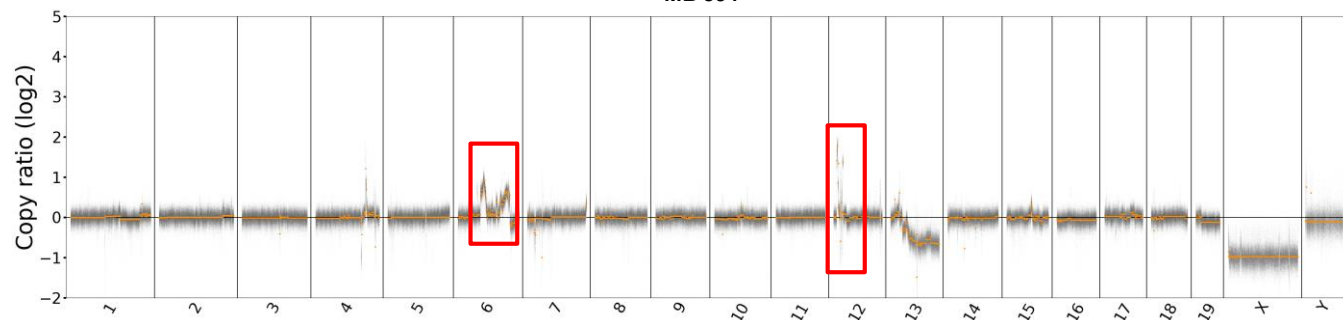

MB 794

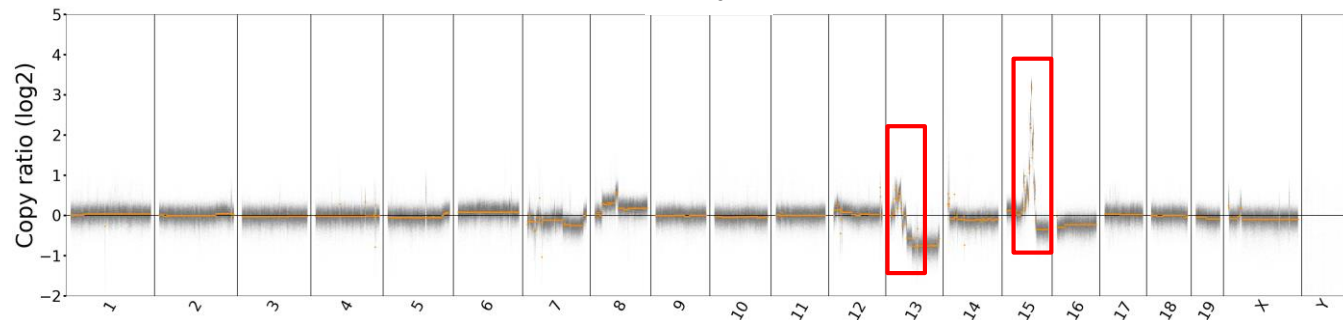

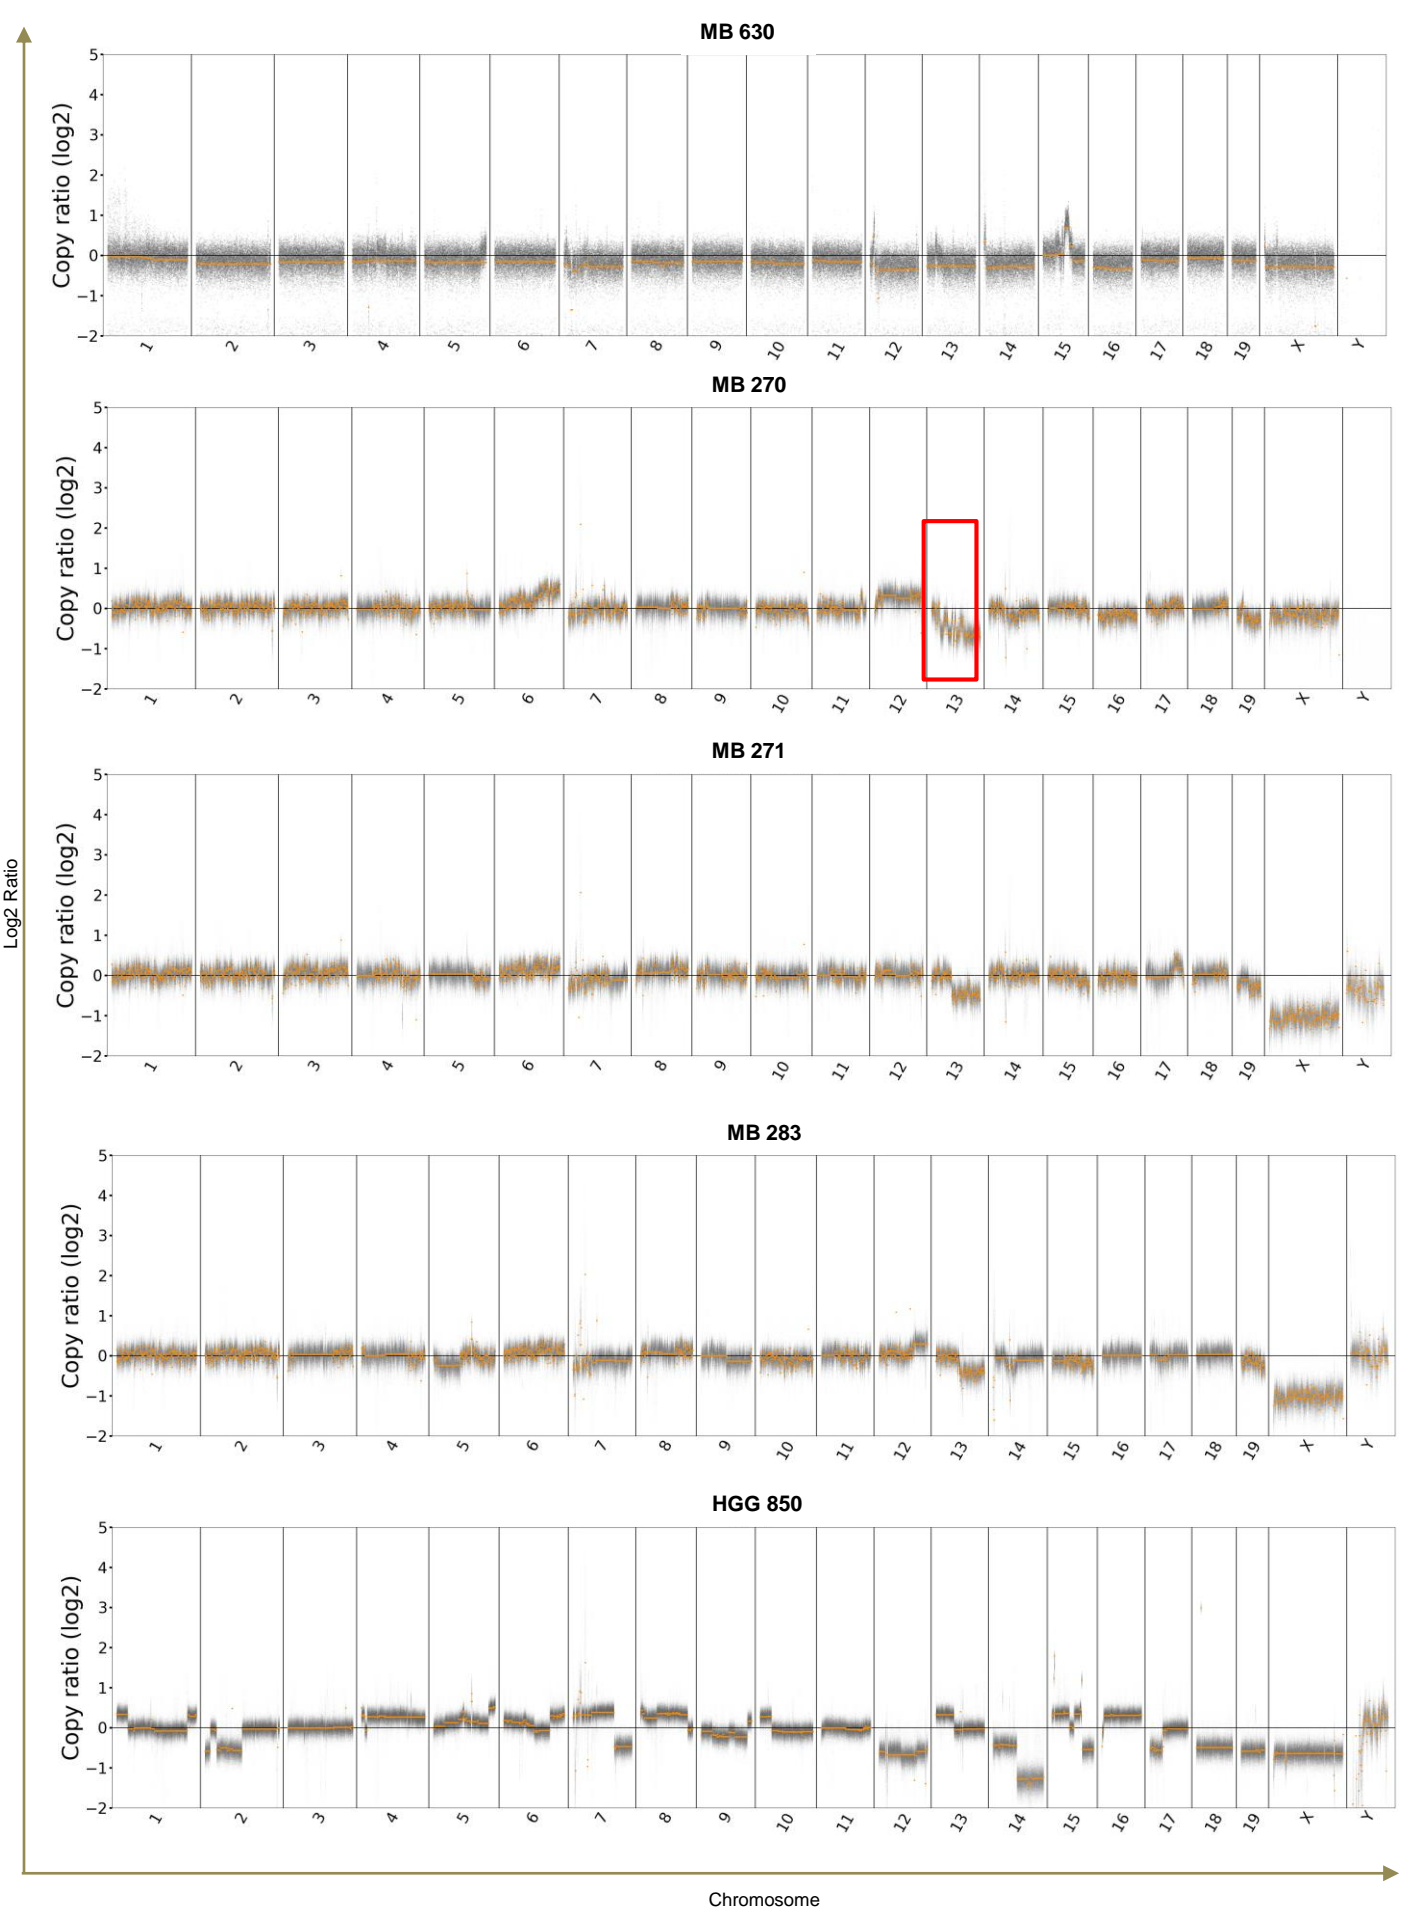

**HGG 851**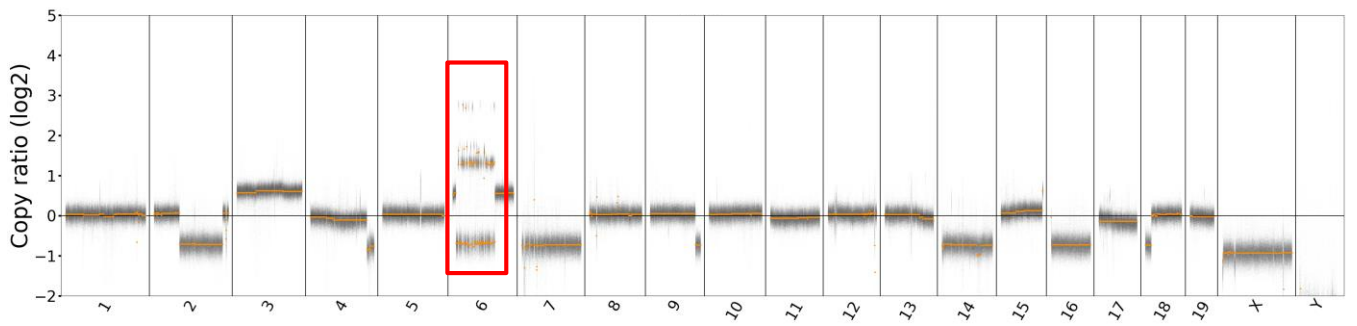**HGG 909**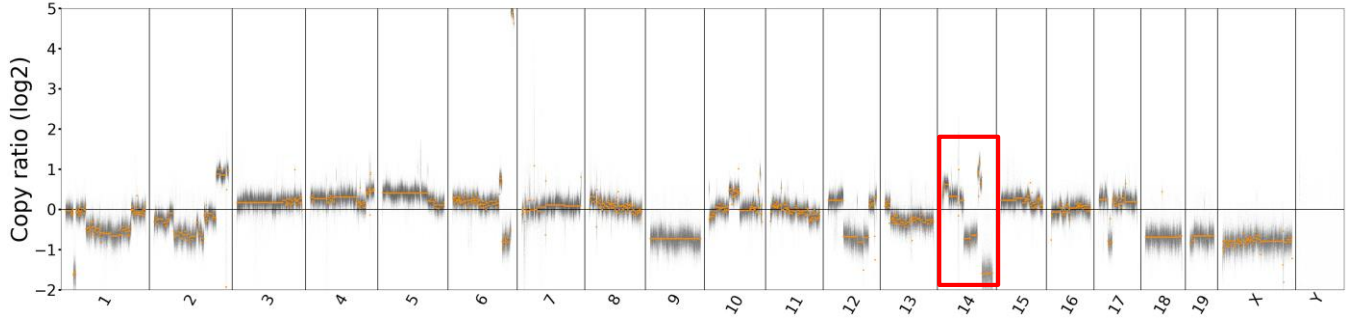**HGG 377**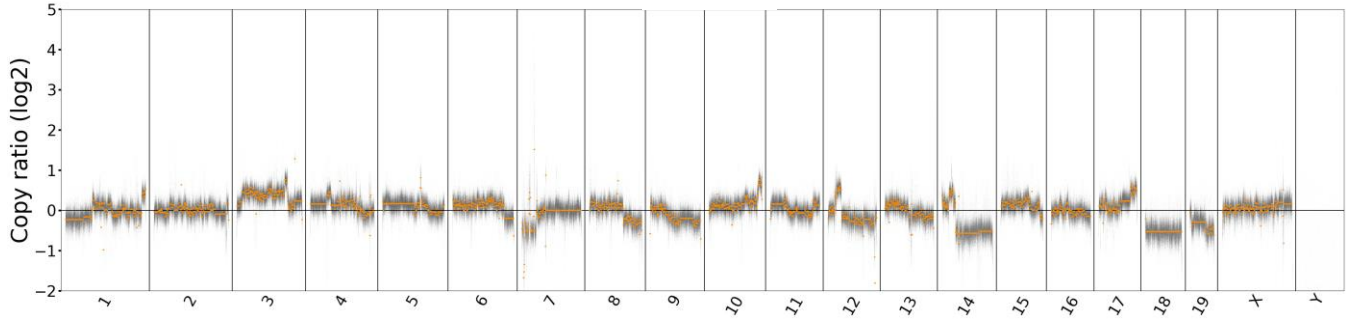**HGG 364**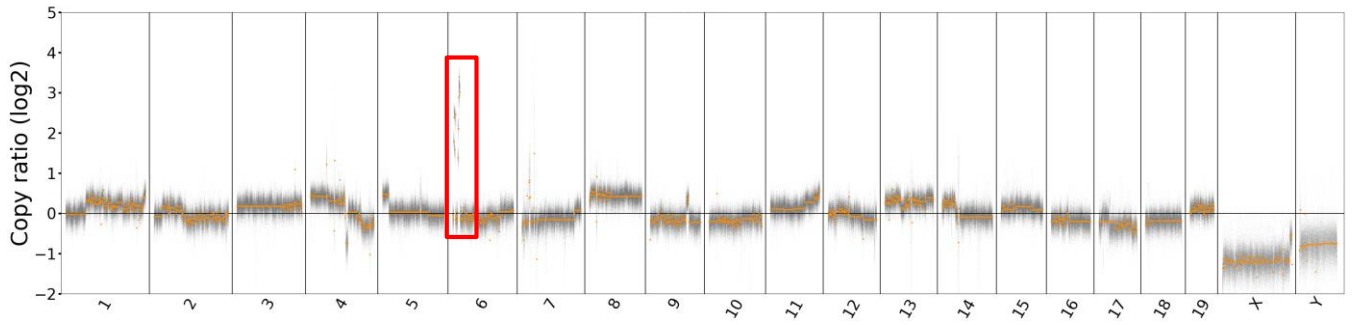**HGG 384**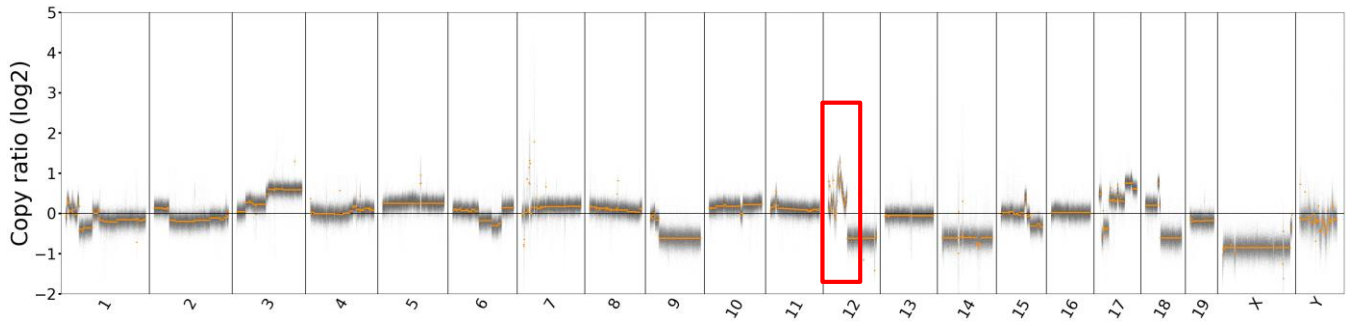

HGG 334

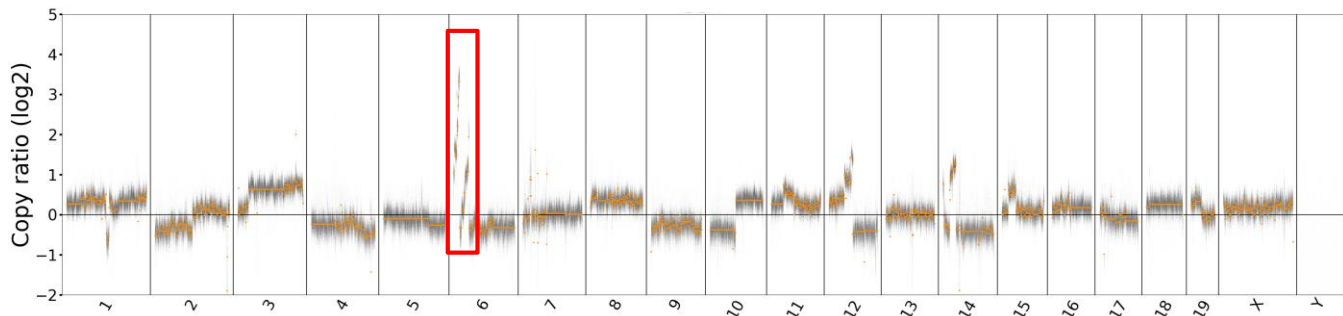

HGG 934

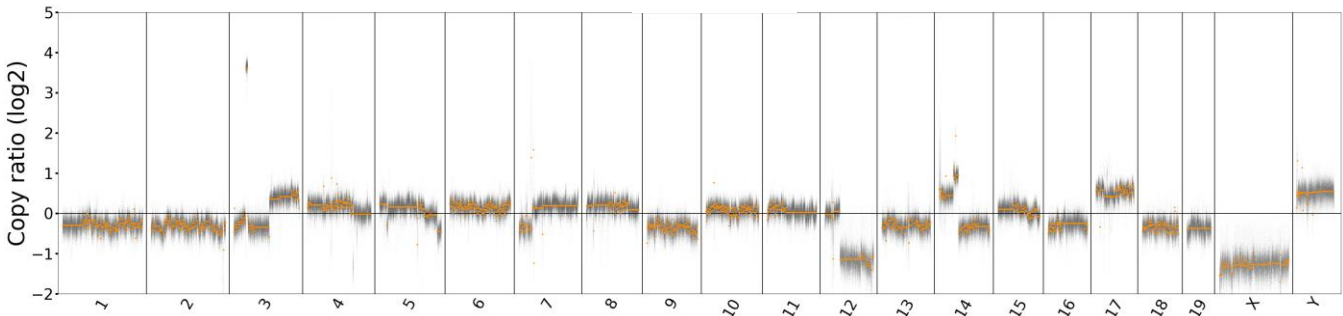

HGG 859

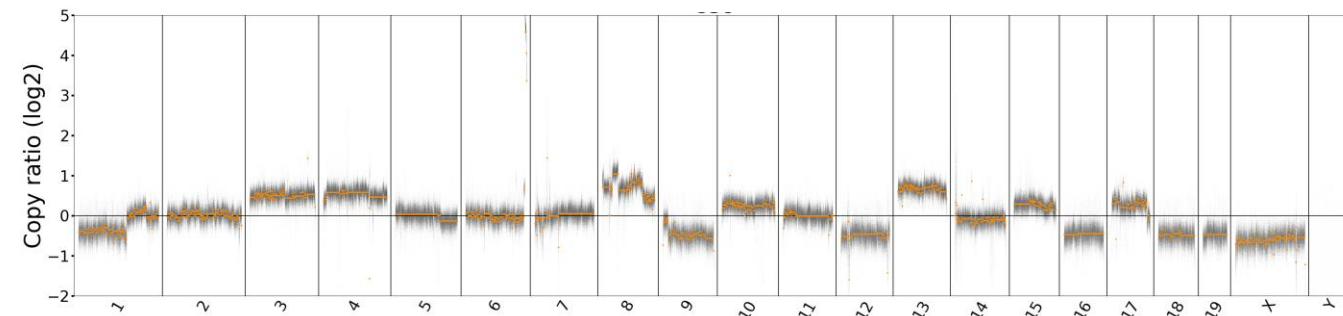

HGG 621

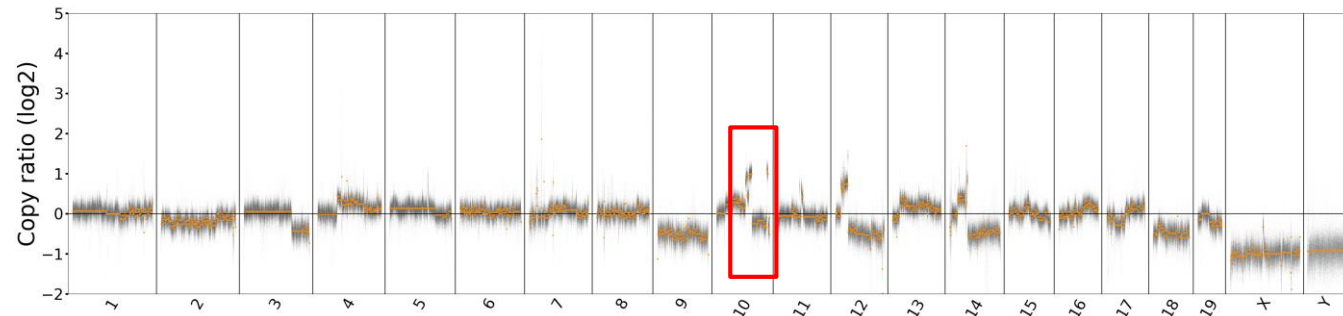

HGG 603

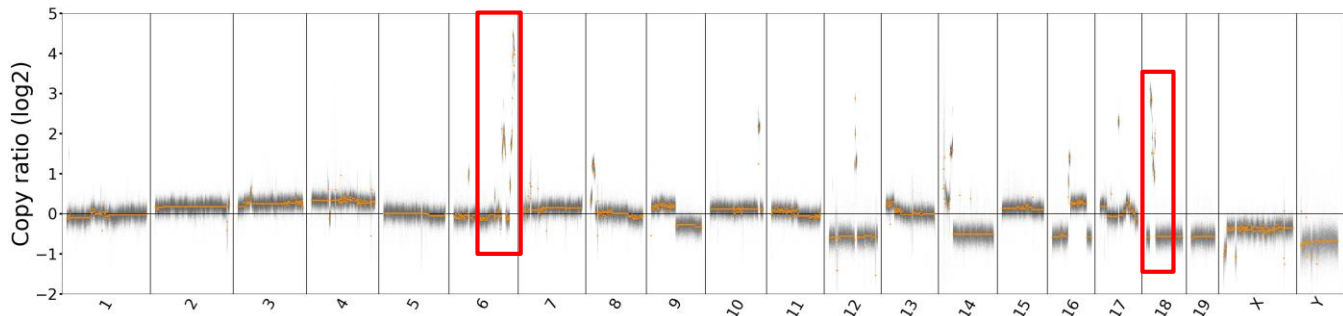

Chromosome

# HGG 608

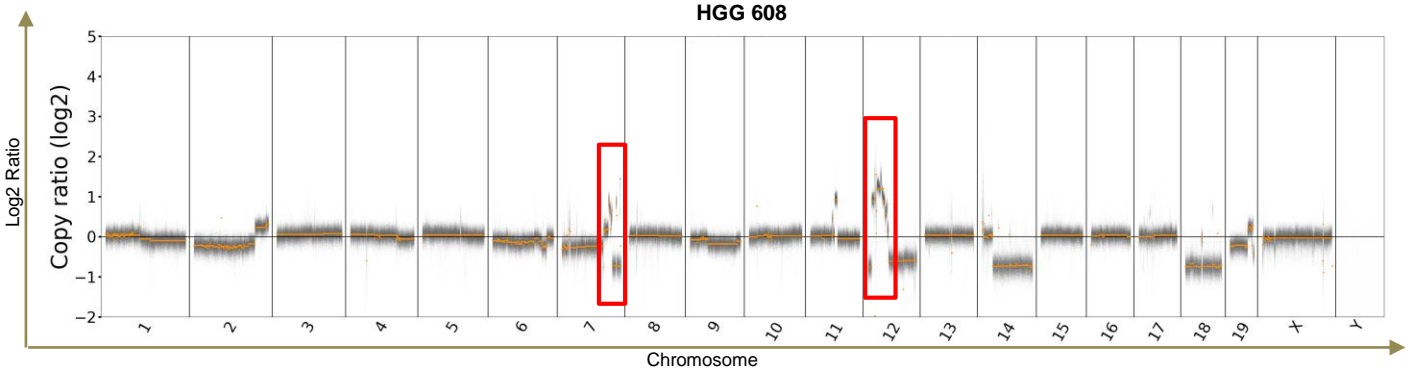

- BND
- TRA
- INV
- CNV

**b.**

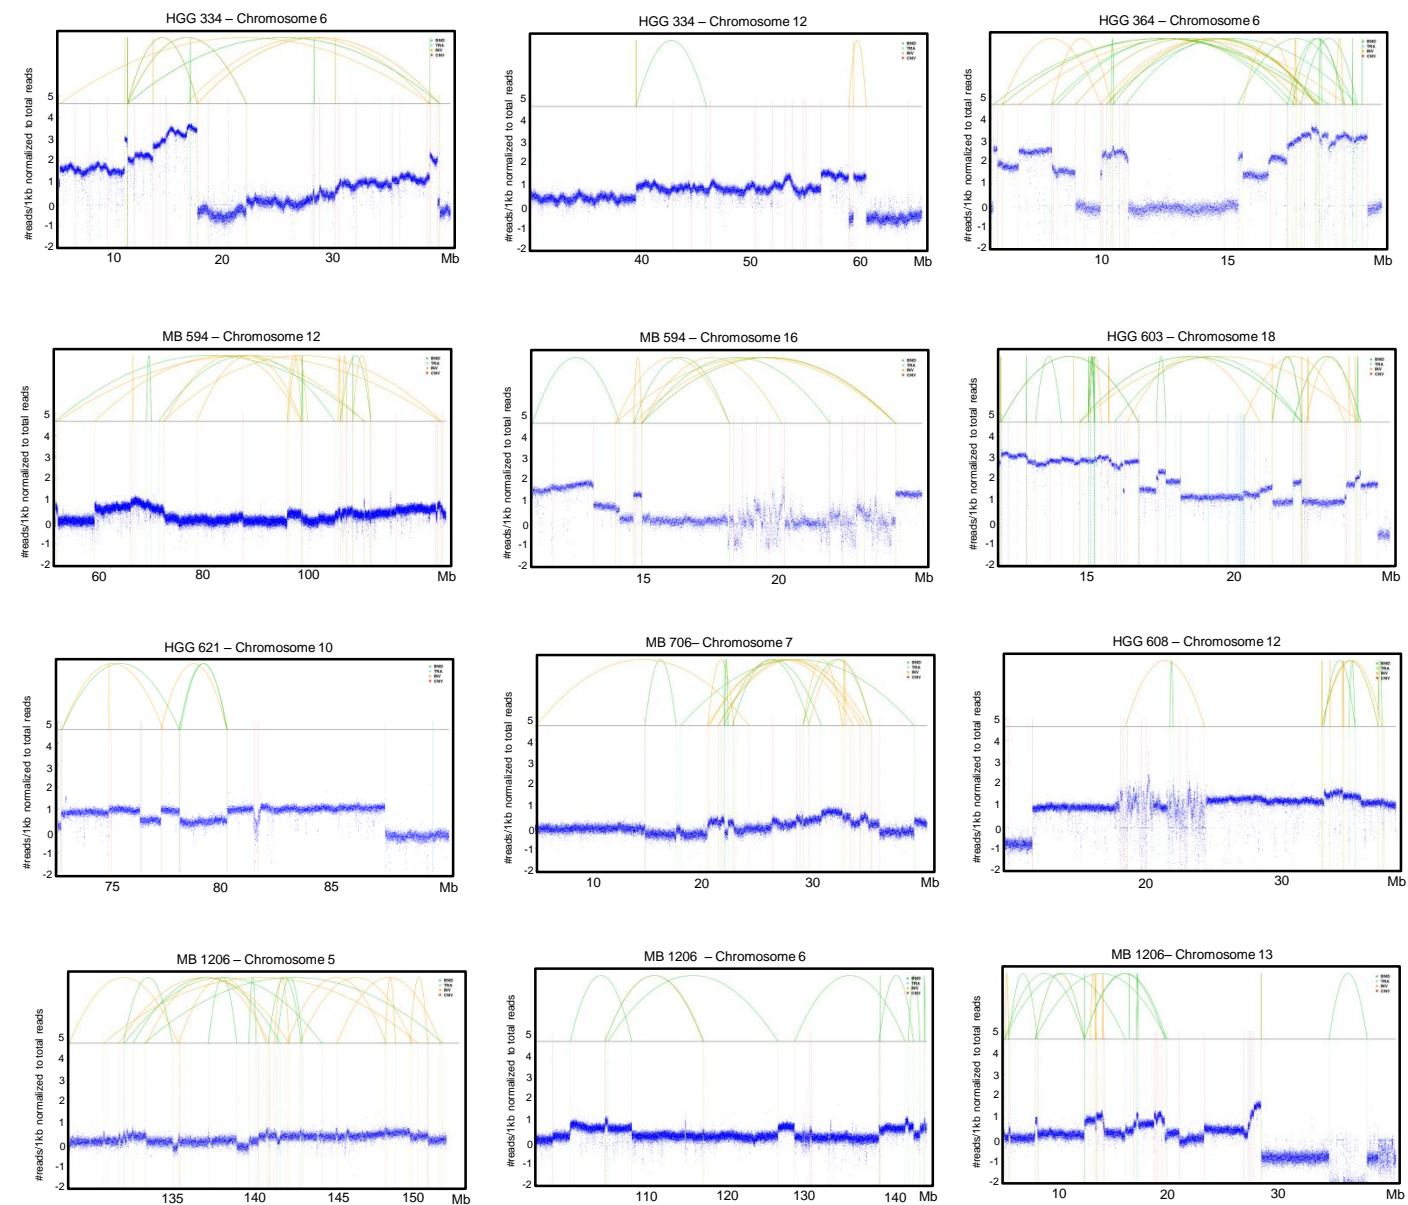

MB 1224 – Chromosome 15

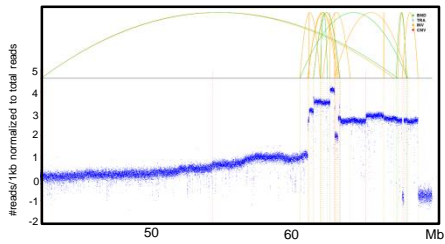

HGG 909 – Chromosome 14

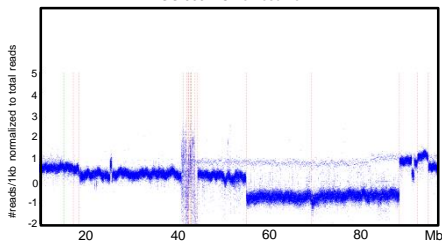

MB 1207 – Chromosome 7

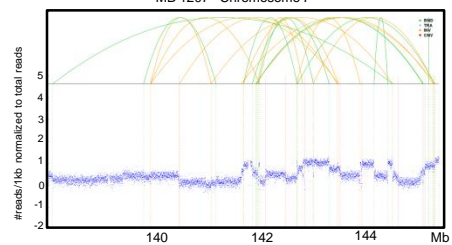

HGG 334 – Chromosome 12

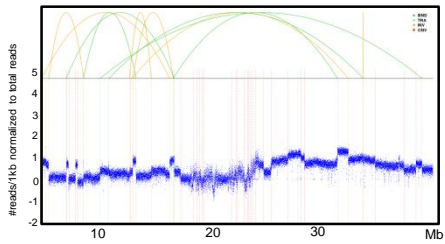

HGG 608 – Chromosome 7

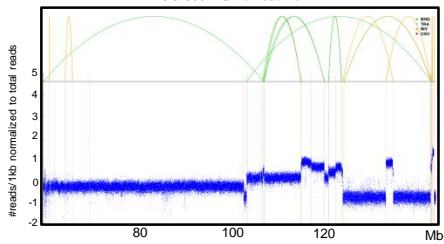

MB Nxp005 – Chromosome 13

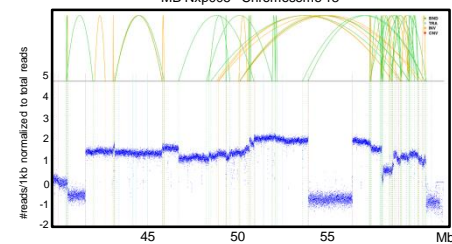

**C.**

- BND
- TRA
- INV
- CNV

**HGG 334**

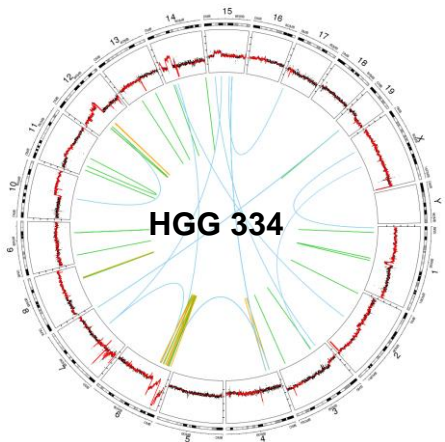

**HGG 377**

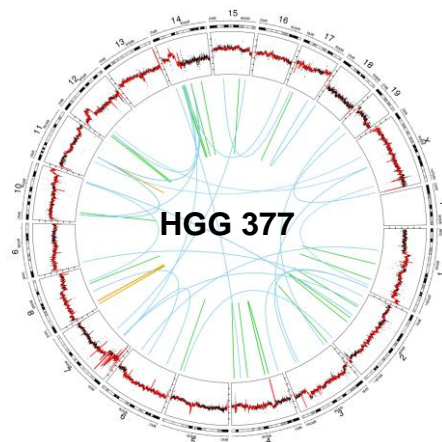

**HGG 364**

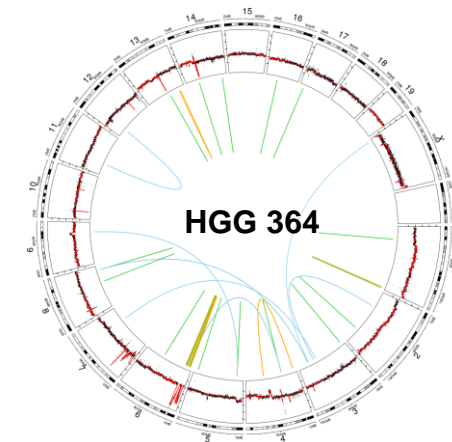

**HGG 384**

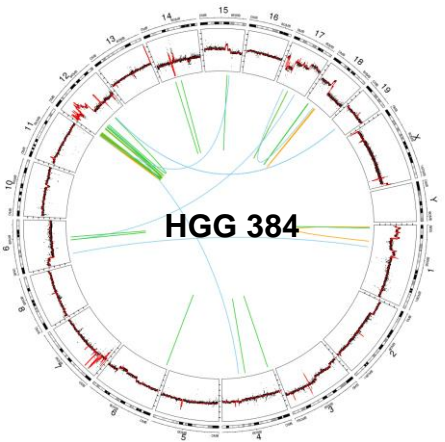

**MB 506**

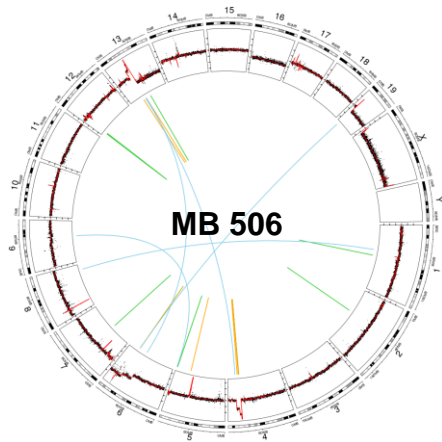

**MB 594**

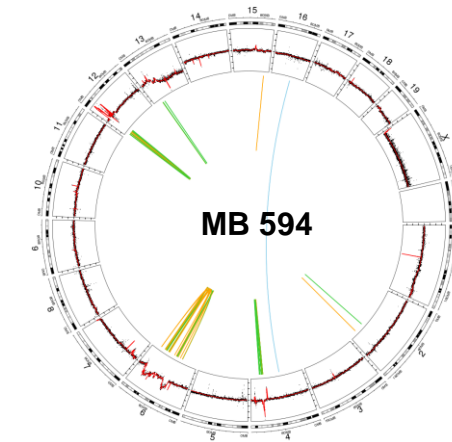





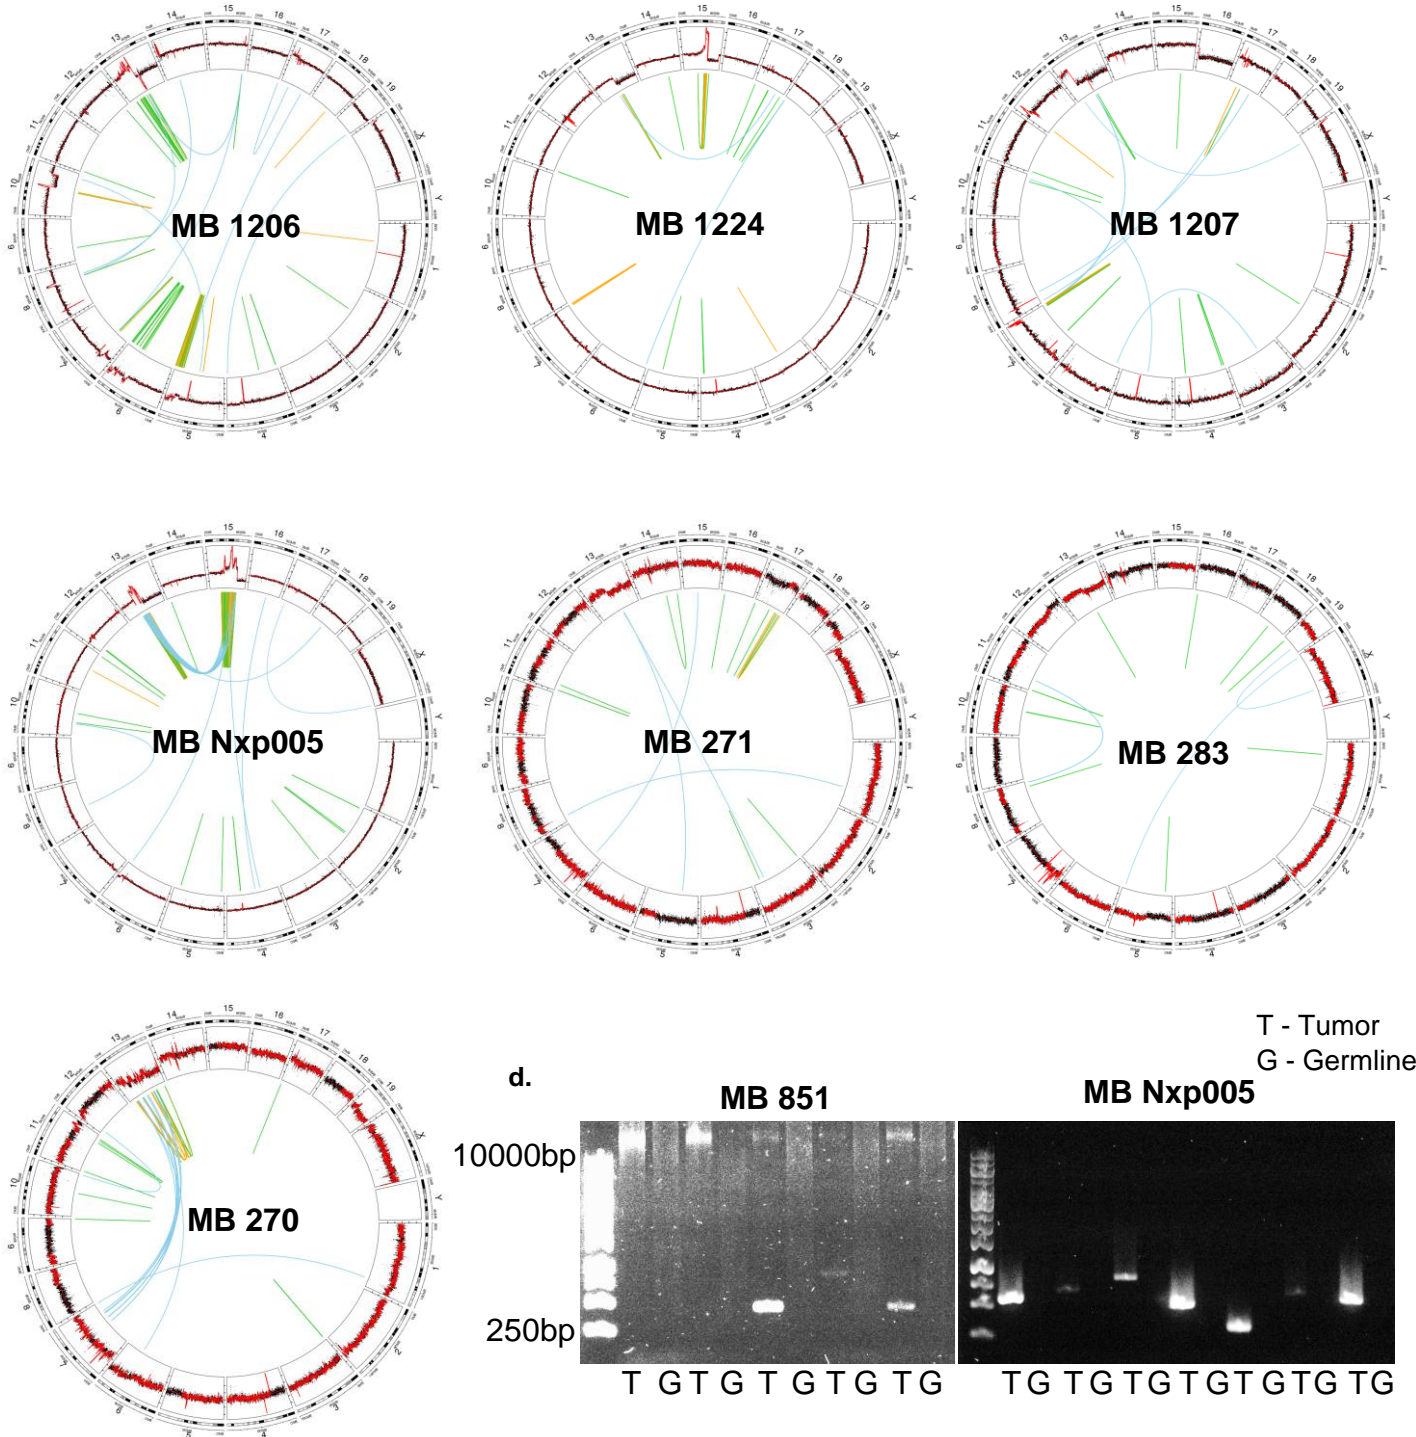

**Supplementary Figure 1 : Coverage plots for all analyzed murine tumors, CIRCOS plots and blow-out views of the chromosomes affected by complex rearrangements and validation of a subset of structural variants by PCR.**

**a.** Coverage plots for all analyzed murine tumors. Red boxes show chromosomes affected by complex genome rearrangements. Blow-out views of all affected regions are shown in **b** and circos plots in **c**. **b.** Blow-out views for regions affected by complex genome rearrangements in all murine tumors. BND, break end; TRA, translocation; INV, inversion; CNV, copy-number variation. **c.** CIRCOS plots for all murine tumors. BND, break end; TRA, translocation; INV, inversion; CNV, copy-number variation. **d.** Validation of a subset of rearrangements by PCR. For 12 of the 14 breakpoints for which we designed primers, we obtained a PCR product at the expected size.

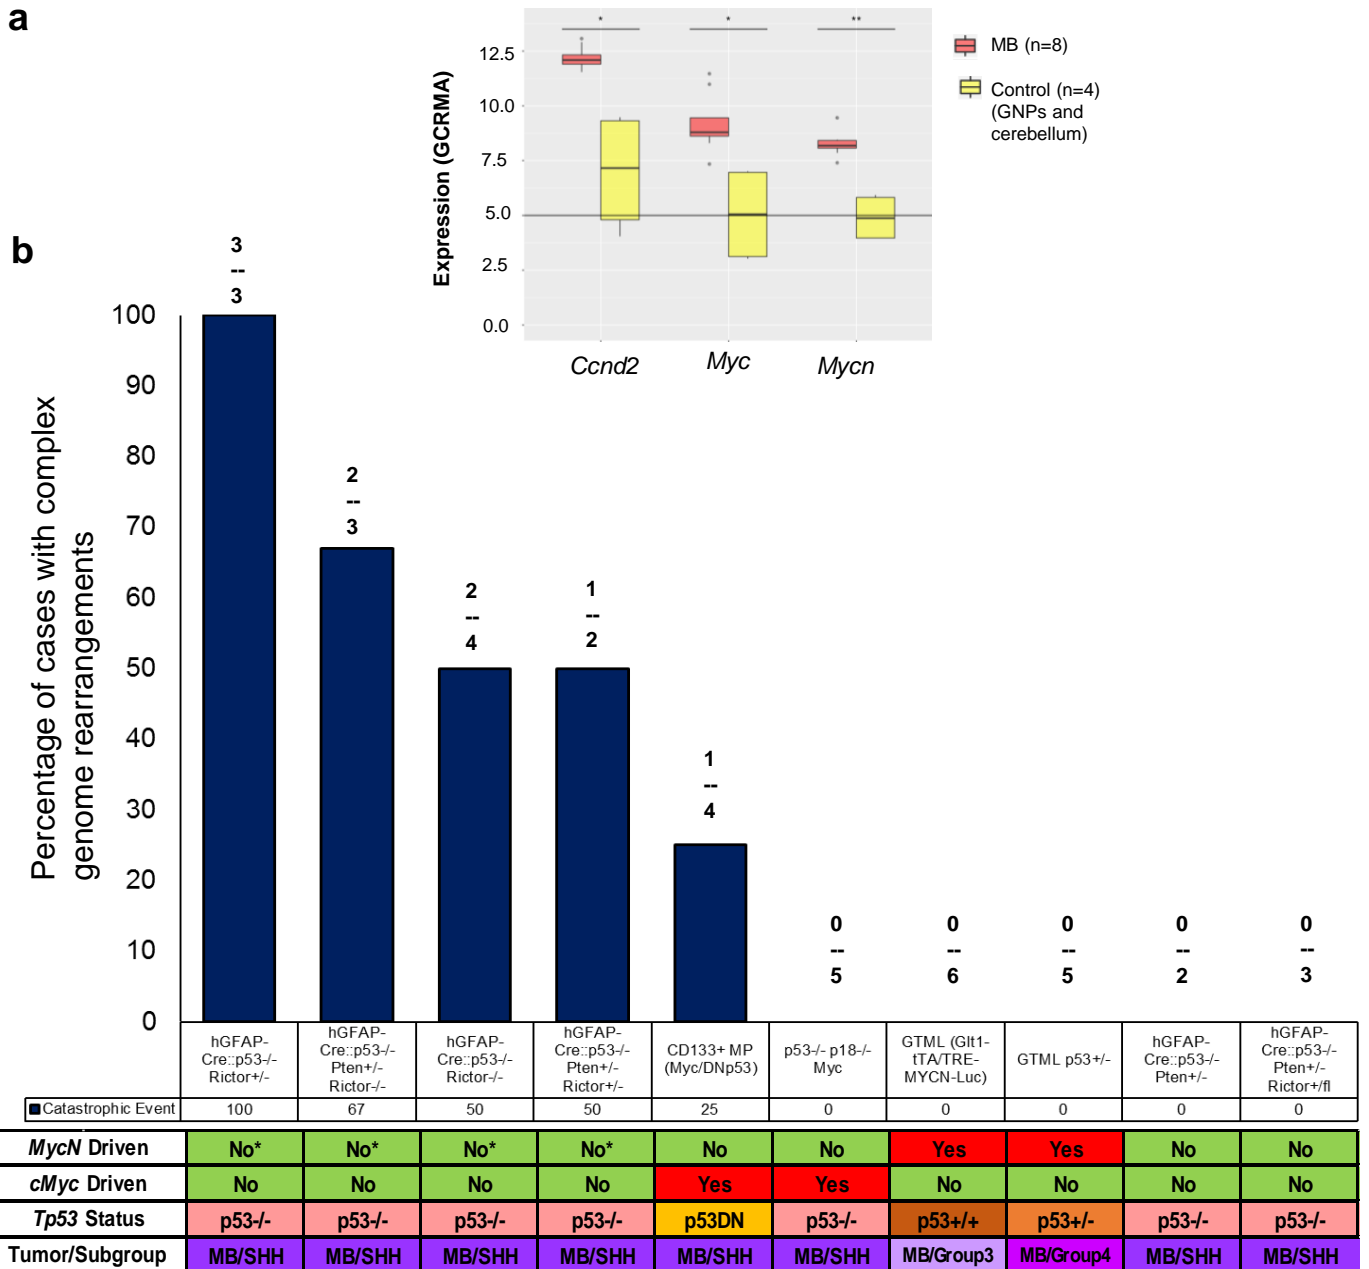

\*Note: these models show *MycN* amplification as a second hit in 33% of the analyzed tumors p53DN, p53 Dominant Negative; MB, Medulloblastoma; SHH, Sonic Hedgehog

**Supplementary Figure 2: Complex genome rearrangements drive tumor development and frequency of complex rearrangements in DNA repair proficient murine MBs and in MYC/MYCN-driven MB models with various p53 status**

**a.** Complex genome rearrangements drive tumor development. Driver genes located in the chromosome regions affected by the catastrophic events are overexpressed. Expression levels for selected genes from Affymetrix expression arrays for medulloblastomas from XRCC4/p53 deficient mice (MB, n=8) and normal brain from animals of the same genotype (Control, n=4; 2 from whole cerebella and 2 from isolated cerebellar granule neural progenitors, shown together on the yellow box plots). Unpaired t-tests were used to test for significance. **b.** Frequency of complex genome rearrangements in DNA repair proficient mouse models of medulloblastoma of various p53 status. Re-analysis of low-coverage WGS data from published studies<sup>1, 2</sup>. From the 10 mouse models (3 to 6 mice per genotype), 4 are MYC- or MYCN-driven (see table below). A subset of the MBs from the mouse models not based on *Myc/Mycn* overexpression show *Myc/Mycn* amplifications (marked with asterisks).

**a.**

MB 794 – Chromosome 15

MB 594 – Chromosome 12

Number of FISH signals for 100 metaphases

MB 794 MB 594

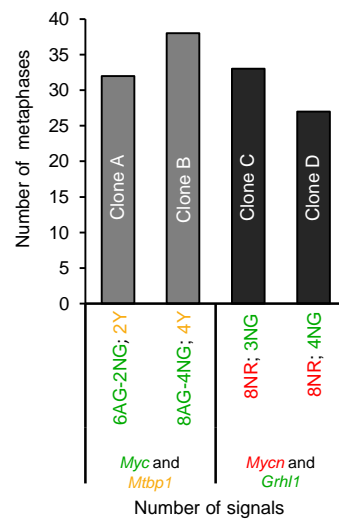

AG: amplified green, NG/R/Y: normal green/red/yellow signal

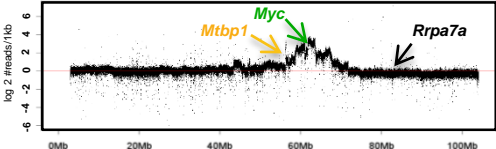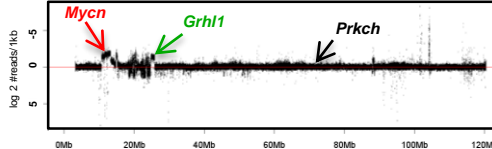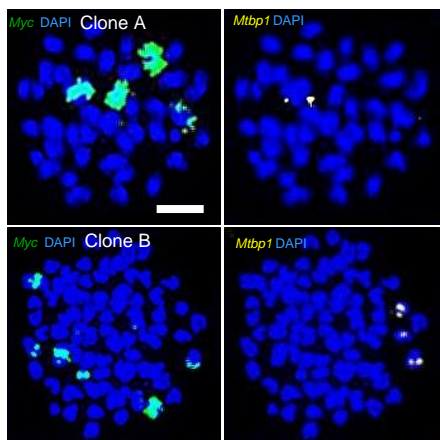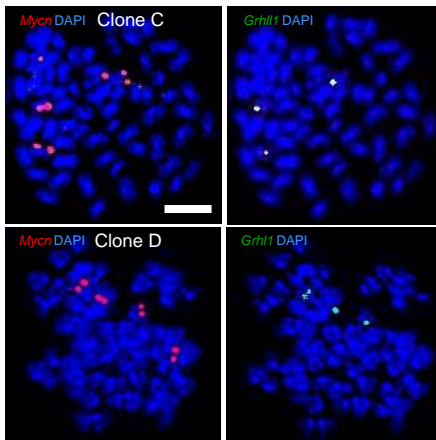**b.**

MB 794

Normal Metaphases

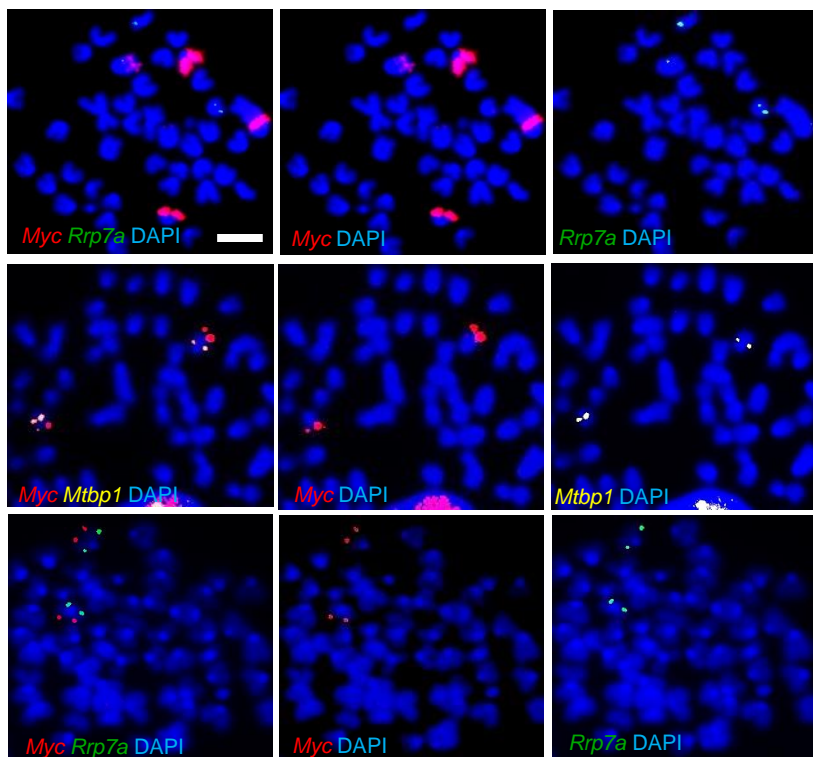

MB 794 – Chromosome 15

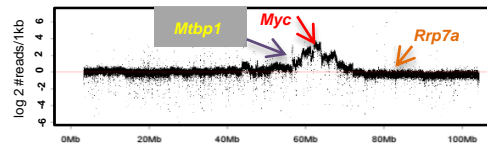

**C**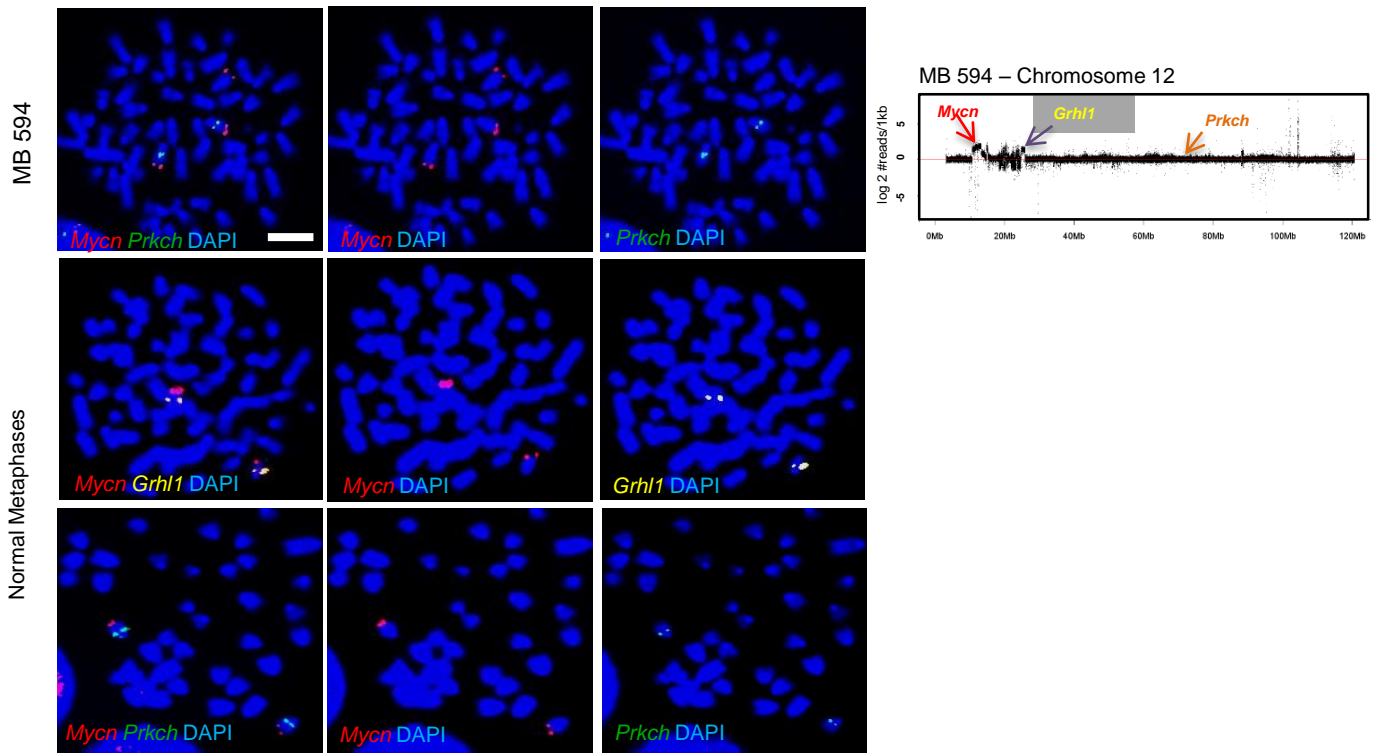

### Supplementary Figure 3: Amplifications of *Myc* and *Mycn* are linked with catastrophic events

**a.** Amplifications of *Myc* and *Mycn* may possibly facilitate catastrophic events. FISH analysis with probes for *Myc* (RP23 98D8, green) or *Mycn* (RP23 10C3, red) in combination with probes matching for loci affected by complex genome rearrangements (*Mtbp1*, RP23 288J22 and *Grhl1*, RP23 431C5) showed subpopulations of cells with amplifications of *Myc* or *Mycn* but without gain associated with complex genome rearrangements, suggesting that amplifications of *Myc* or *Mycn* might potentially occur before the catastrophic event. Quantifications of the signals for the control probes *Rpa7a* and *Prkch* are shown in Supplementary Figure 3b and c. Magnification, X1000. **b.** Top panel showing amplifications of *Myc* (RP23 98D8) in comparison to the control probe *Rrp7a* (RP23 25N17) in metaphase spreads from tumor cells. Bottom two panels showing FISH for probes *Myc*, *Mtbp1* (RP23 288J22) and *Rrp7a* in metaphase spreads from a healthy control mouse. Magnification X1000. **c.** Top panel showing amplification of *Mycn* (RP23 10C3) in comparison to *Prkch* (RP23 440M11) in metaphase spreads from tumor cells. Bottom two panels showing FISH for *Mycn*, *Grhl1* (RP23 431C5) and *Prkch* in metaphase spreads from a healthy control mouse. Magnification X1000.

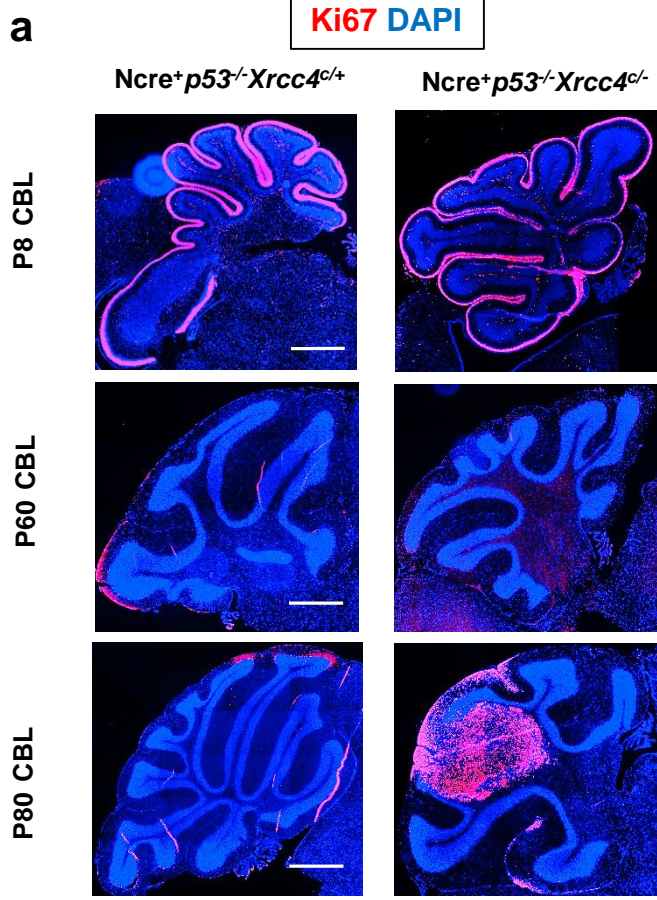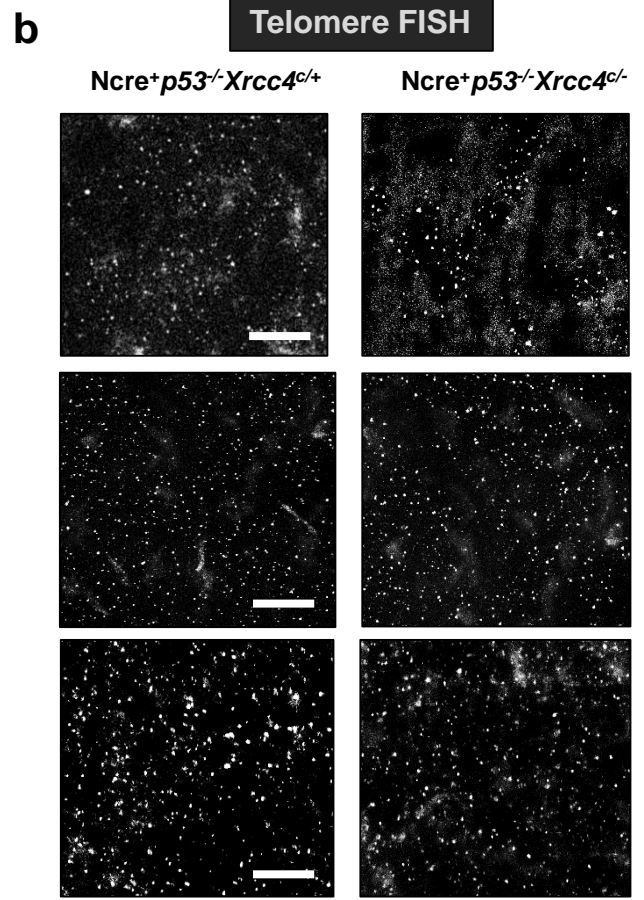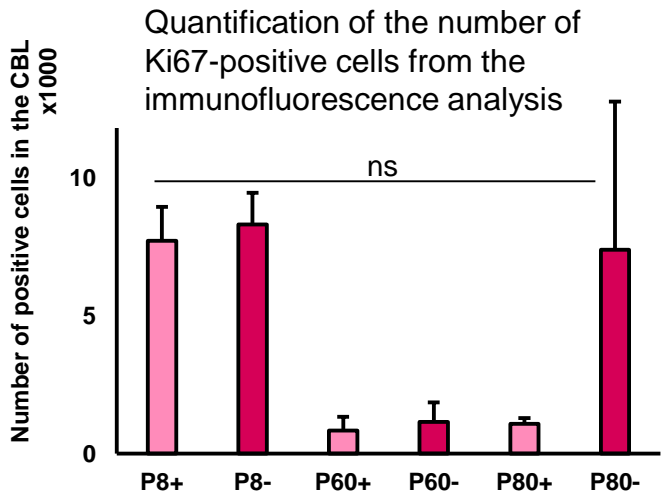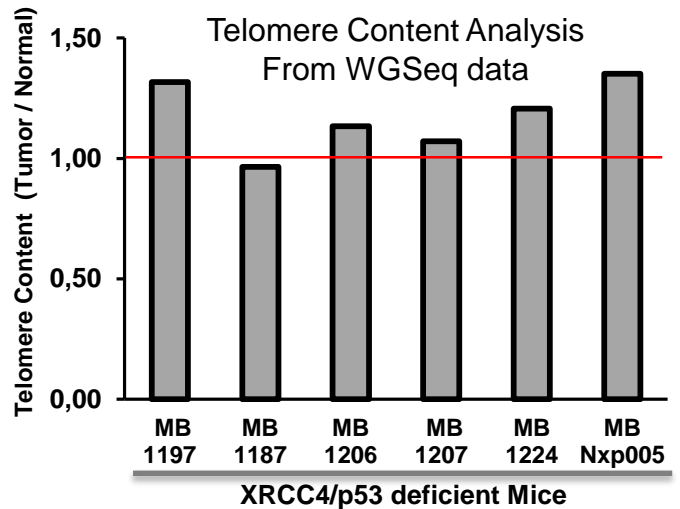

**Supplementary Figure 4: Telomere FISH and immunofluorescence analysis for Ki67 in the brain of *Xrcc4/p53* deficient and control heterozygous mice**

**a.** Immunofluorescence for Ki67 and Telomere FISH analysis in the cerebellum of *XRCC4/p53* deficient and control mice. Ki67 magnification, X100; Unpaired t-tests were used to test for significance. Between 4 and 12 sections were analyzed per animal. *XRCC4* deficient mice, 9 animals; *XRCC4* proficient mice, 5 animals. CBL, cerebellum. Unpaired t-tests were used to test for significance. Between 4 and 12 sections were analyzed per animal. *XRCC4* deficient mice, 9 animals; *XRCC4* proficient mice, 5 animals. CBL, cerebellum. **b.** Telomere FISH magnification X1000. Telomere content analysis from the whole-genome sequencing data was done according to Telomere Hunter<sup>3</sup> and did not show any significant difference between tumor and matched germline controls or between cases with or without complex genome rearrangements

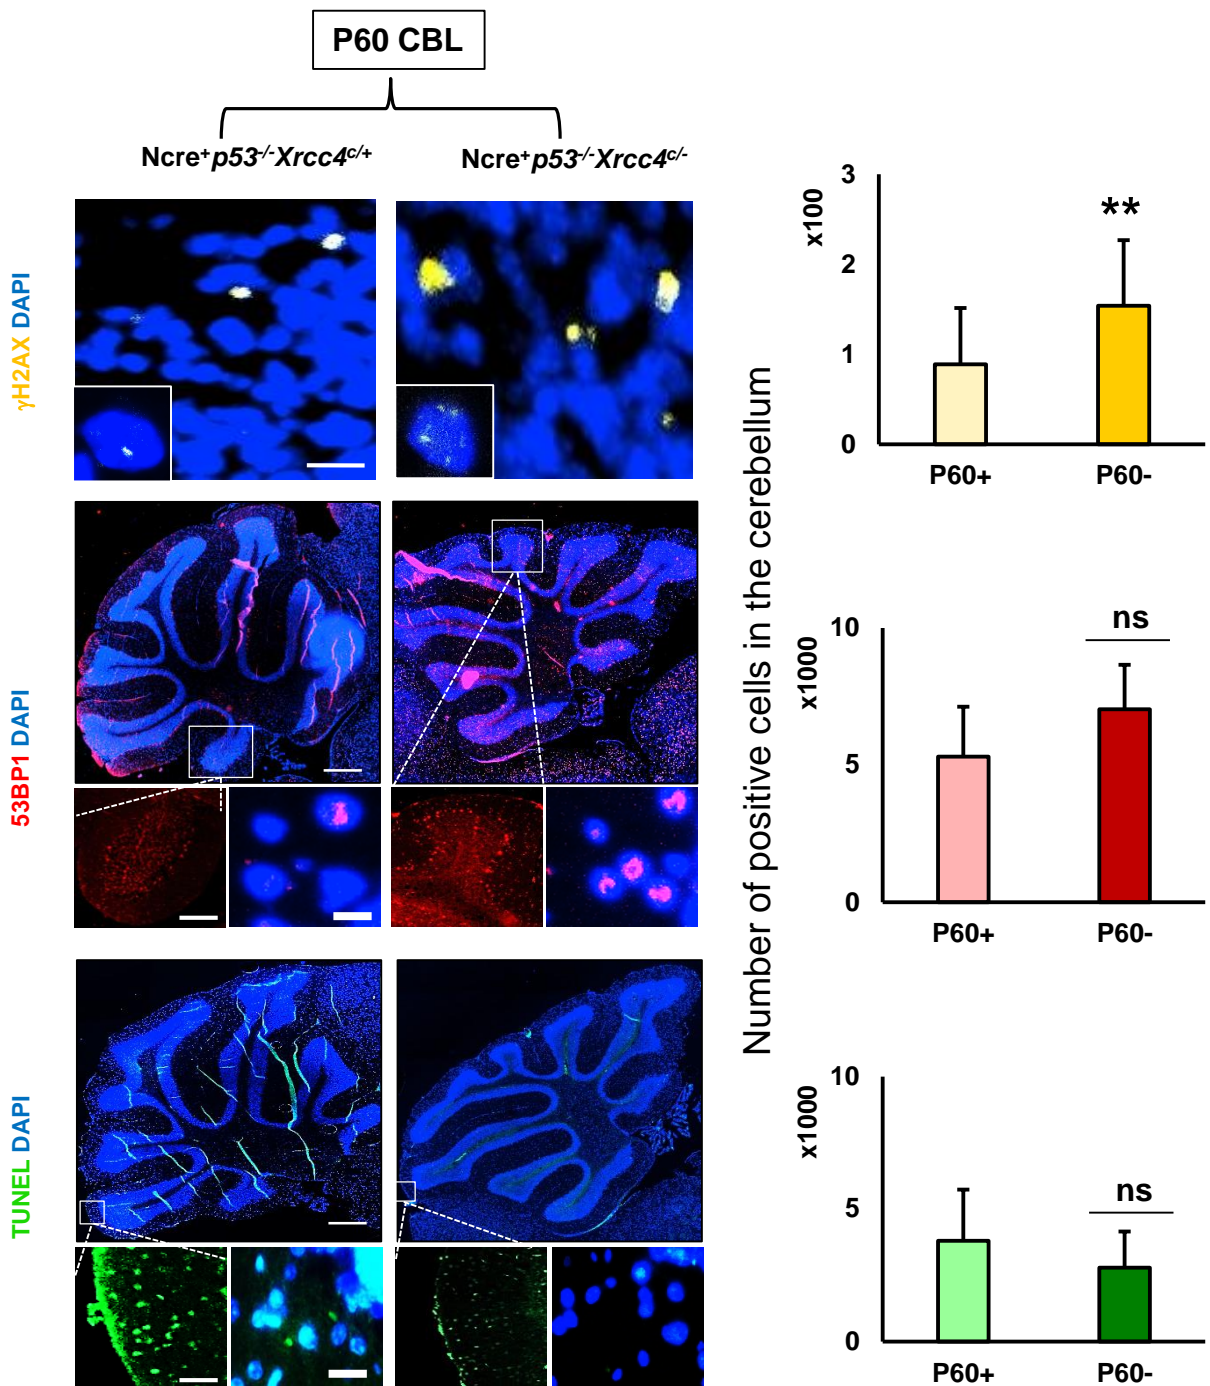

**Supplementary Figure 5: Representative images of TUNEL, gH2AX and 53BP1 staining's at intermediate developmental stages with quantifications of the numbers of positive cells**

Intermediate time point (P60), γH2AX, 53BP1 and TUNEL staining in the cerebellum of XRCC4/p53 deficient mice and control animals (magnification, X100; insets, X200 and X1000 respectively). Unpaired t-tests were used to test for significance for the quantifications. Between 4 and 12 sections were analyzed per animal. XRCC4 deficient mice, 9 animals; XRCC4 proficient mice, 5 animals.

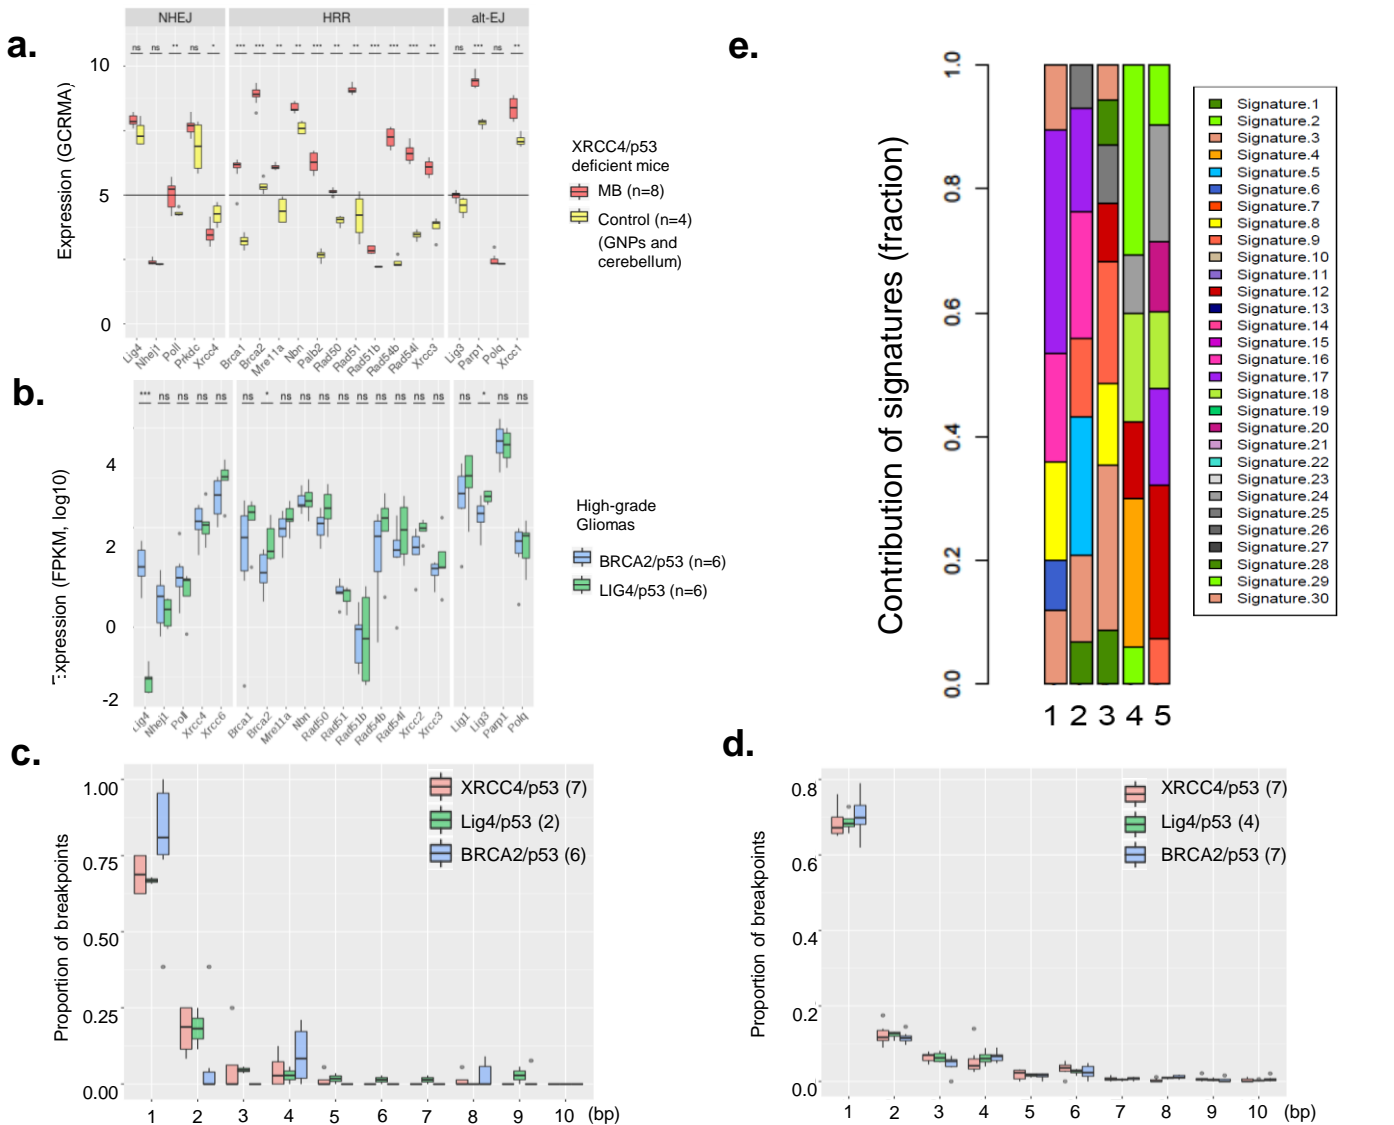

**Supplementary Figure 6: Expression levels for the main repair factors, controls for microhomology analysis (indels) and controls for mutational signature analysis**

Normalized expression levels for repair factors involved in the main DNA DSB repair processes **a.** Red boxes show the expression levels in medulloblastoma cells of XRCC4/p53 mice (n=8) and yellow boxes show the expression levels in the healthy cerebellum (n=2) and in granule neural progenitors (n=2) for age-matched animals of the same genotype (the expression levels for the non-neoplastic cerebellum and for granule neural progenitors were not significantly different and therefore shown as one box). The horizontal line depicts the threshold for which genes are considered to be expressed **b.** Normalized expression levels for repair factors in high grade gliomas developing in BRCA2/p53 (blue boxes) or Lig4/p53 (green boxes) deficient animals. Unpaired t-tests were used to test for significance in **a** and **b.** **c.** Size of small deletions related to homology in regions affected by catastrophic events. The plot shows the sizes of the small deletions (<=10bp) within regions affected by catastrophic events. Indels were called by svaba using default threshold and filtering. The differences are not significant (beta-regression analysis). **d.** Size of small deletions related to homology in all regions. The plot shows the sizes of the small deletions (<=10bp) in the whole genome. Indels were called by svaba using default threshold and filtering. The differences are not significant (beta-regression analysis). **e.** Controls for Mutational Signature analysis. As mutational signature 3 was detected in homologous recombination proficient tumors (see figure 4), we wanted to test whether mutational signature 3 might be linked with deficiencies in the p53 pathway, beyond the association with HR defects. Therefore, we did mutational signature analysis for mouse models with published high-coverage WGS data. 1 and 2 are murine mammary carcinomas from a STAT1 knock-out model<sup>4</sup> (with a *Rad50* mutation in 1), 3 is a pancreatic tumor from a p53 wild-type/*Cdkn2a* deficient model<sup>5</sup>, 4 and 5 are from a p53 wild-type aflatoxin B induced tumor model<sup>6</sup>.



**a**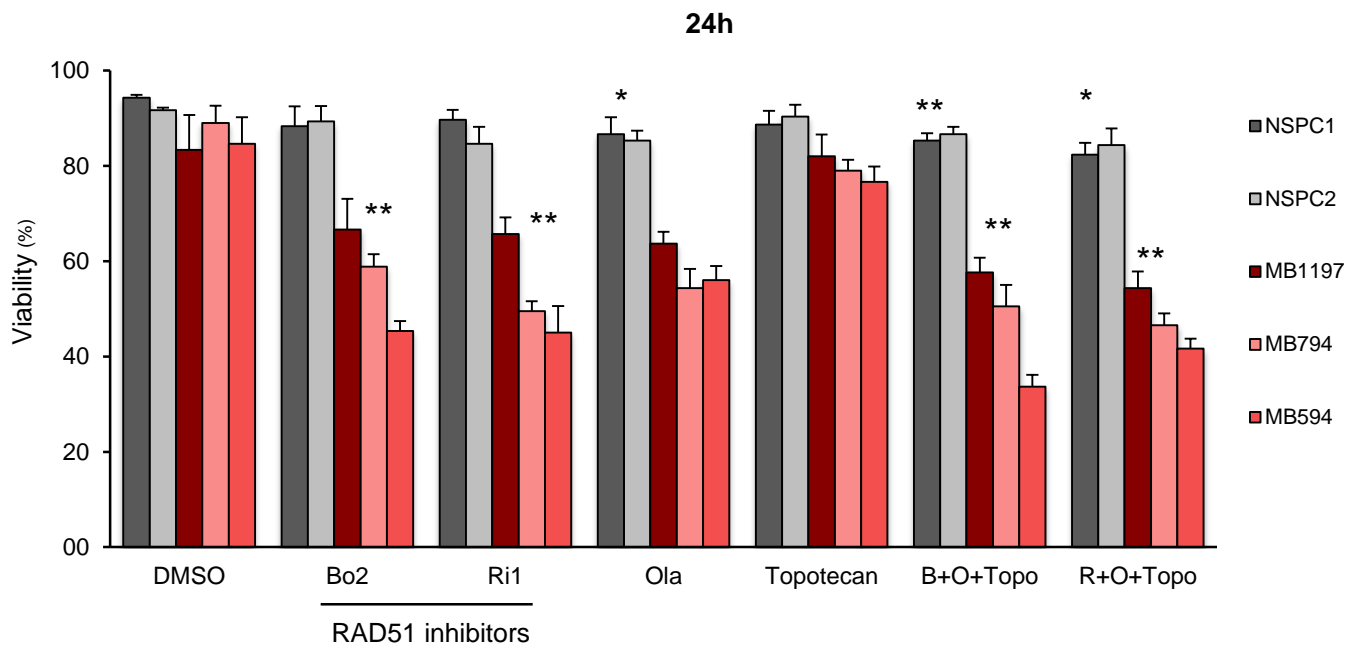**b****A172 (HGG)**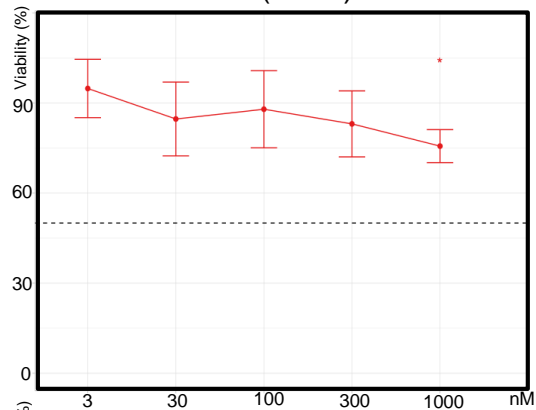**DAOY (MB)**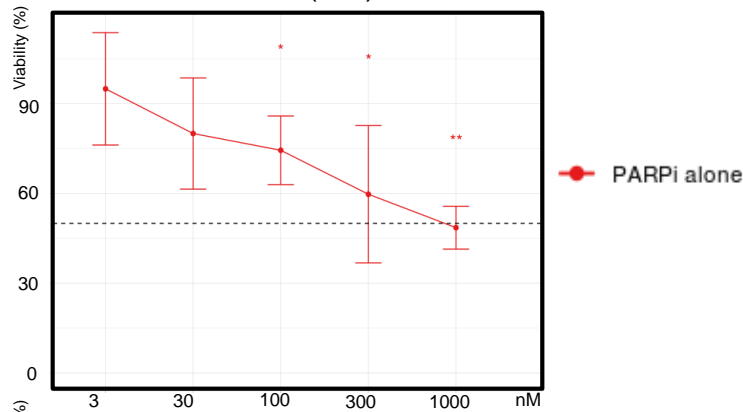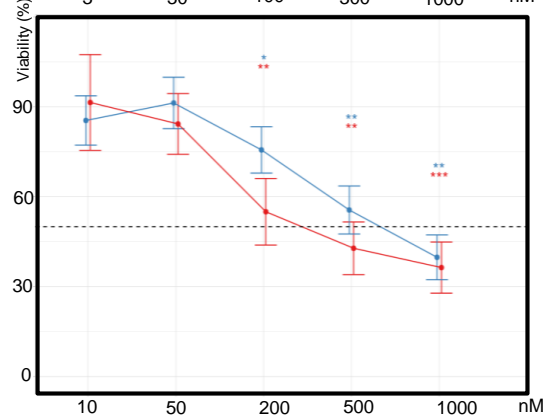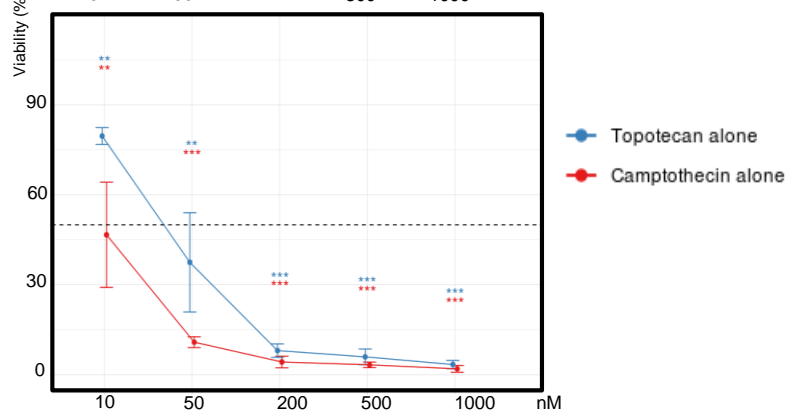

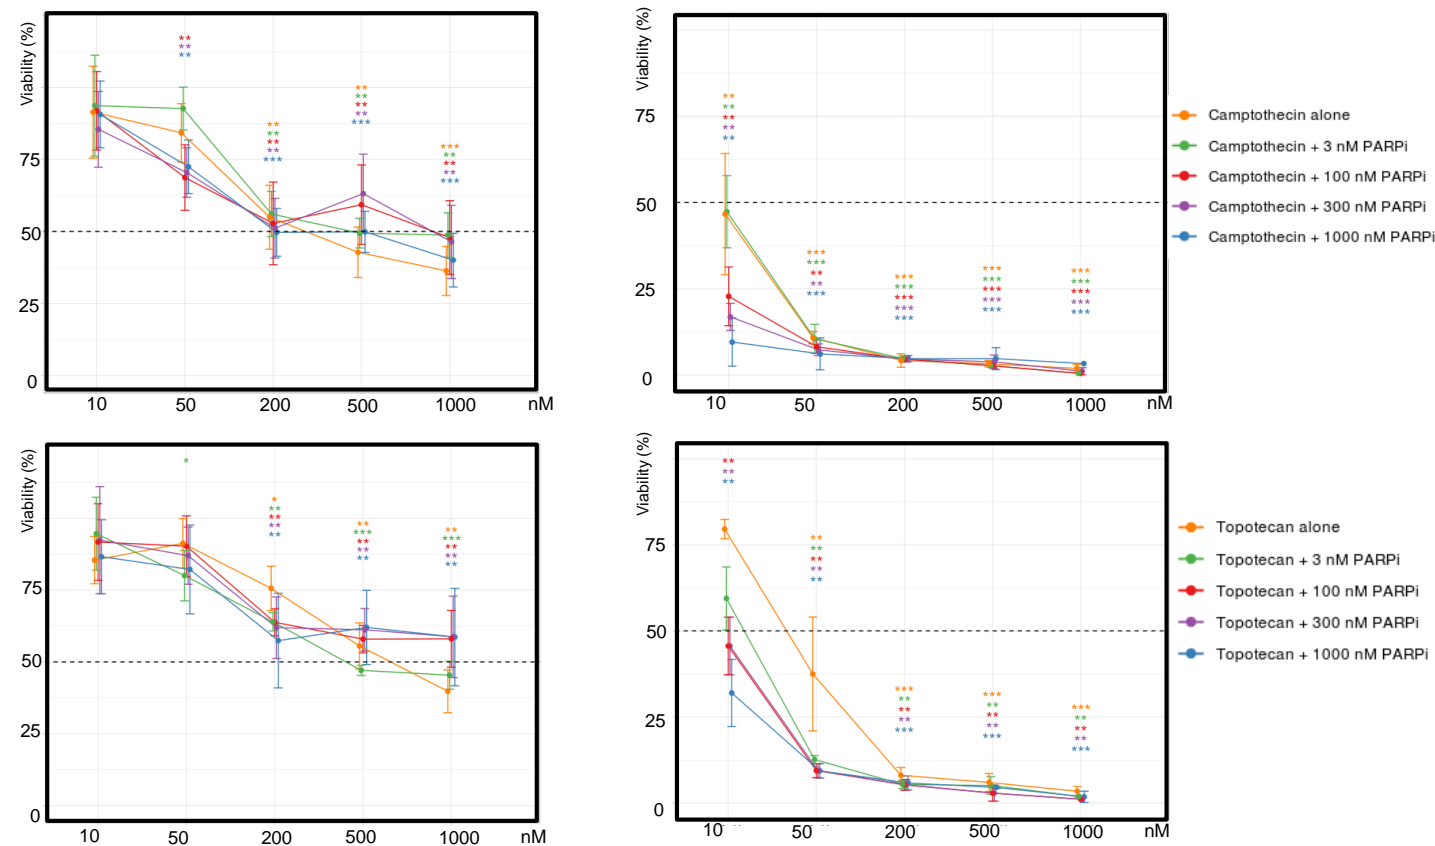

**Supplementary Figure 7: Synthetic lethality in mouse cells, read-out after 24h of treatment. Cytotoxicity of PARPi in combination with topoisomerase inhibitors in human medulloblastoma and high-grade glioma cells with complex genome rearrangements.**

**a.** Early time point (24h) for synthetic lethality approaches targeting medulloblastoma cells from XRCC4/p53 deficient mice. Medulloblastoma cells (MB594, MB794 and MB1197) from Nestin-Cre *p53*<sup>-/-</sup> *Xrcc4*<sup>o/c</sup> and Nestin-Cre *p53*<sup>-/-</sup> *Xrcc4*<sup>c/c</sup> mice as well as control neural progenitor cells (NSPC1 and NSPC2) from Nestin-Cre *p53*<sup>-/-</sup> *Xrcc4*<sup>+/-</sup> mice were treated with RAD51 inhibitors to block HR (B02, 10uM and Ri1, 10uM), PARP inhibitor (Olaparib, 5uM), topotecan to induce DNA damage (100nM) or with combinations (B02 10uM, Olaparib 5uM and Topotecan 100nM or Ri1 10uM, Olaparib 5uM and Topotecan 100nM). Cell viability values are shown as averages +/- standard deviation for 3 independent experiments. ANOVA was used to test for significance. **b.** The effect of single drug treatments and combinations with PARPi (Talazoparib, 3nm-1µM), Topotecan or Camptothecin (10nm-1µM) on human medulloblastoma (DAOY) and glioblastoma (A172) cells with complex genome rearrangements, measured after 72 h. Cell viability values are shown as averages +/- standard deviation for 3 to 4 independent experiments as percentages of the values for solvent-only cells.

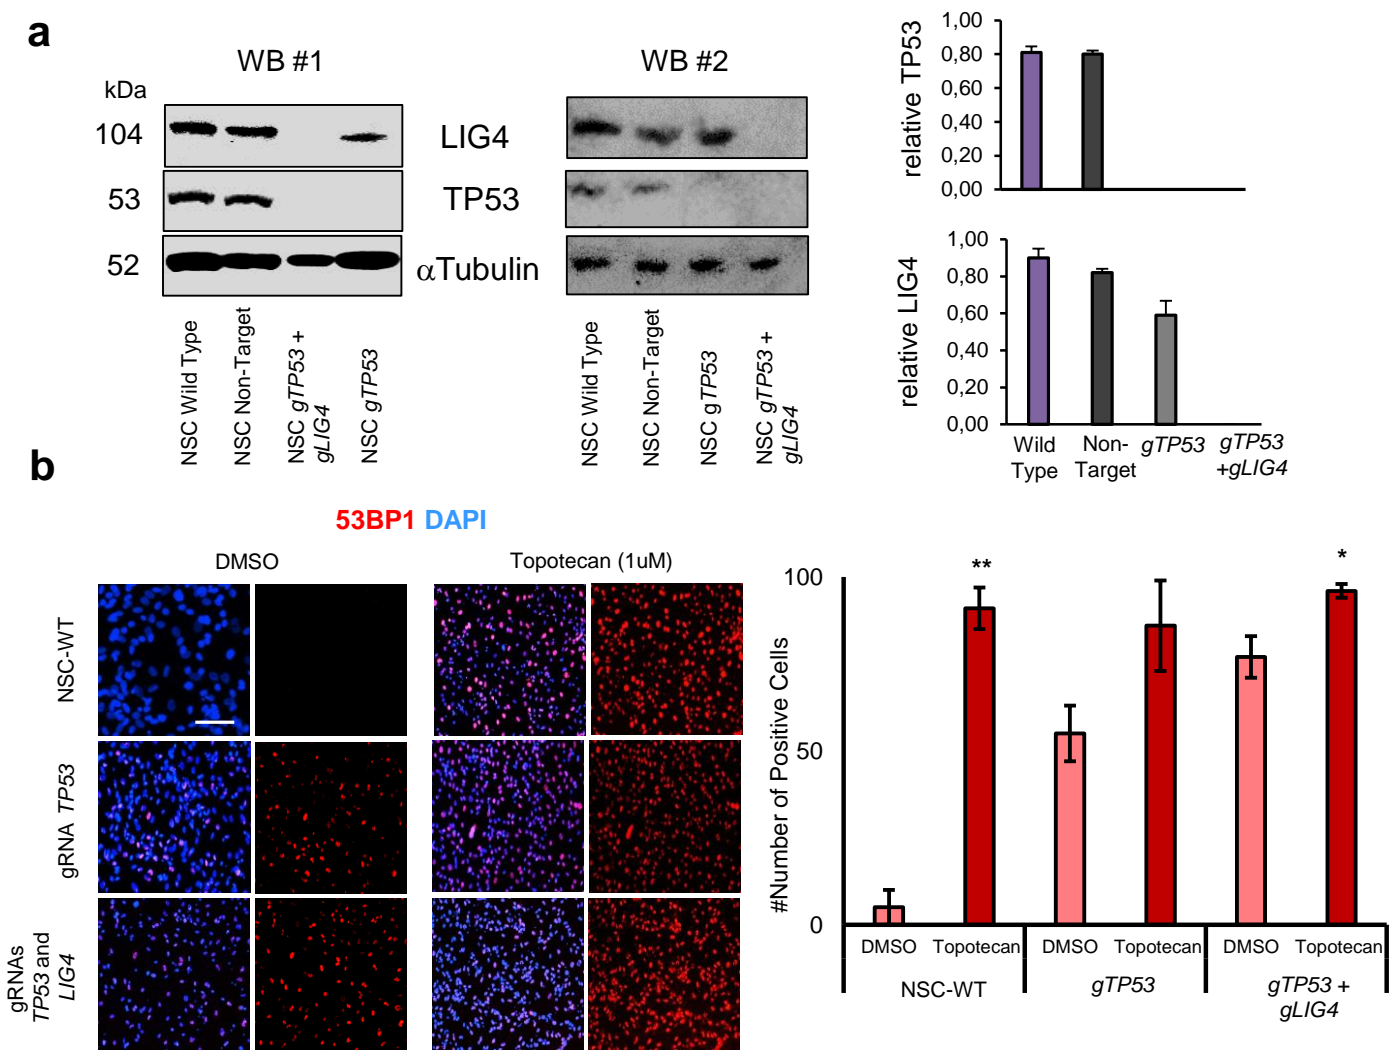

### Supplementary Figure 8: Validation of CRISPR/Cas9 experiments and immunofluorescence for 53BP1

**a.** Western blot showing whole protein lysates for human neural stem cells (NSCs) for wild type, non target, CRISPR/Cas-mediated disruption of *TP53* and/or *Lig4*. Bar graph analysis on the right shows average relative LIG4 and TP53 in comparison to Alpha-Tubulin from the two western blots (WB)  $\pm$  SD for two independent experiments. **b.** 53BP1 immunofluorescence for NSC DMSO control and NSC topotecan (1uM) treated cells after 48h. Magnification X100. Bar graph on the right shows the number of positive cells for 53BP1 from a total of 100 counted cells. Error bars indicate  $\pm$ SD for three independent experiments

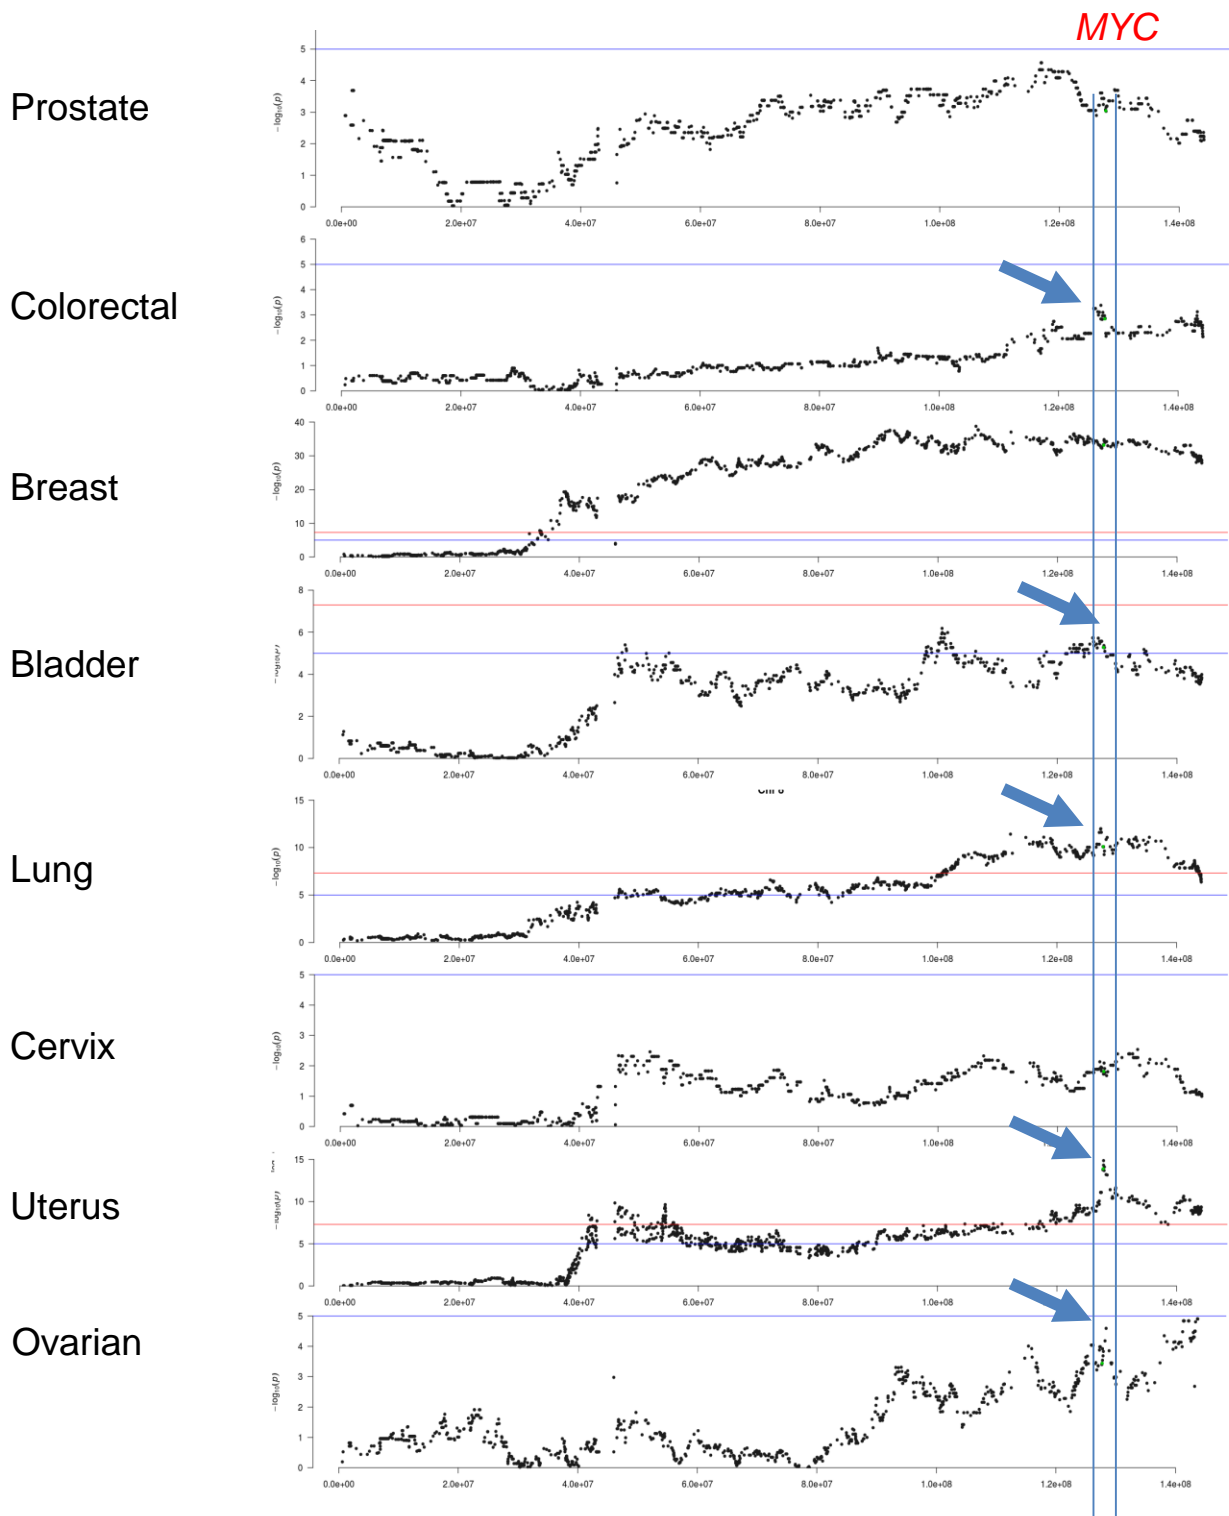

**Supplementary Figure 9: Pan cancer analysis of the association between chromothripsis and MYC status in human tumors**

Pan-cancer analysis of regions with copy-number gains significantly associated with chromothripsis. *MYC* gains are strongly linked with chromothripsis across multiple tumor entities (re-analysis of TCGA data). Y axis,  $-\log_{10}(p)$  for the association; x axis, genomic position.

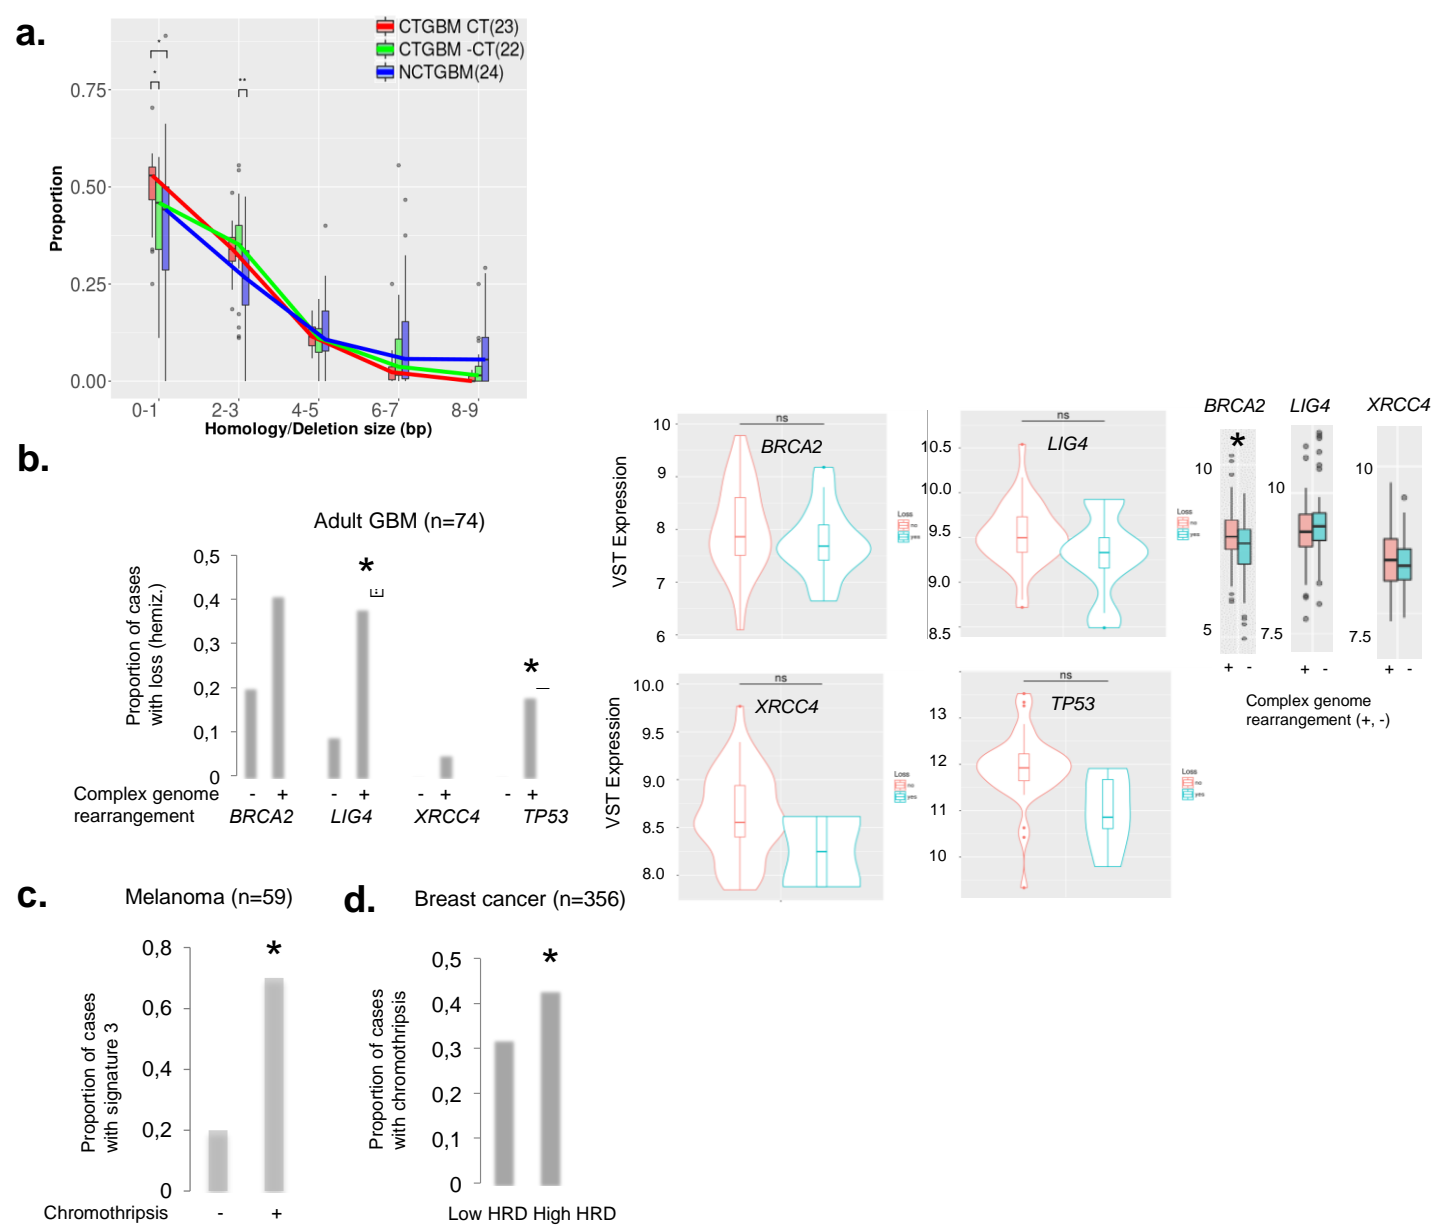

## Supplementary Figure 10: Microhomology at the breakpoints in human GBM and Pan cancer analysis of the association between repair deficiencies and chromothripsis

**a.** Size of the microhomology utilized by the structural variants junctions in different regions in human GBM. “CTGBM CT” indicates breakpoints within chromothriptic regions, “CTGBM -CT” indicates breakpoints outside chromothriptic regions for tumors showing chromothripsis, and “NCTGBM” indicates all breakpoints in tumors without chromothripsis. Beta-regression was used to test for significance. **b.** Association between deficiency in repair processes and chromothripsis in adult glioblastoma. Link between loss of repair factors and chromothripsis in adult GBM cases (reanalysis of TCGA data). Left panel, proportion of cases with loss of the genomic loci where *BRCA2*, *LIG4*, *XRCC4* and *TP53* are located, respectively, among cases with or without chromothripsis. Right panels, expression levels for *BRCA2*, *LIG4*, *XRCC4* and *TP53* in cases with (blue) or without (red) hemizygous loss of the respective genomic loci (violine plots) and in cases with or without chromothripsis (box plots, far right). Unpaired t-tests were used to test for significance. **c.** Link between chromothripsis and mutational signature 3 in melanoma. Unpaired t-tests were used to test for significance. **d.** Link between chromothripsis and Homologous Recombination Deficiency index in breast cancer (reanalysis of data from Nik-Zainal et al, Nature 2016). Low HRD, up to 5; High HRD, 6 and more. Unpaired t-tests were used to test for significance.

## Supplementary References

1. Poschl J, Stark S, et.al., *Acta Neuropathol* 2014 Jul;128(1):123-36. doi: 10.1007/s00401-014-1297-8. Genomic and transcriptomic analyses match medulloblastoma mouse models to their human counterparts.
2. Akgül S, Li Y, et al., *Cell Reports* 2018 Jul 10;24(2):463-478.e5. doi: 10.1016/j.celrep.2018.06.050. Opposing Tumor-Promoting and -Suppressive Functions of Rictor/mTORC2 Signaling in Adult Glioma and Pediatric SHH Medulloblastoma.
3. Genomic footprints of activated telomere maintenance mechanisms in cancer. Sieverling et al, *Nature Communications*, accepted for publication
4. Griffith et al, *Cell Rep.* 2016 Sep 27;17(1):249-260. doi: 10.1016/j.celrep.2016.08.076. Truncating Prolactin Receptor Mutations Promote Tumor Growth in Murine Estrogen Receptor-Alpha Mammary Carcinomas.
5. Mueller et al, *Nature.* 2018 Feb 1;554(7690):62-68. doi: 10.1038/nature25459. Epub 2018 Jan 24. Evolutionary routes and KRAS dosage define pancreatic cancer phenotypes.
6. Mi Ni Huang et al, *Genome Res.* 2017 Sep; 27(9): 1475–1486. Genome-scale mutational signatures of aflatoxin in cells, mice, and human tumors
